1        **Novel MBLs inhibitors screened from FDA-approved drug library**  
2                **restore the susceptibility of carbapenems to NDM-1-harboured**  
3                                **bacteria**

4    Yan Guo<sup>1#</sup>, Hongtao Liu<sup>1#</sup>, Mengge Yang<sup>1#</sup>, Rui Ding<sup>1</sup>, Yawen Gao<sup>2</sup>, Xiaodi Niu<sup>2</sup>,  
5    Xuming Deng<sup>1</sup>, Jianfeng Wang<sup>1\*</sup>, Haihua Feng<sup>1\*</sup>, Jiazhang Qiu<sup>1\*</sup>

6    <sup>1</sup> Key Laboratory of Zoonosis, Ministry of Education, College of Veterinary Medicine,  
7    Jilin University, Changchun, Jilin 130062, China

8    <sup>2</sup> College of Food Science and Engineering, Jilin University, Changchun, Jilin 130062,  
9    China

10

11    # These authors contributed equally to this work.

12

13    \* Corresponding authors: Jiazhang Qiu, [qiujz@jlu.edu.cn](mailto:qiujz@jlu.edu.cn); Haihua Feng,  
14    [fhh70@163.com](mailto:fhh70@163.com); Jianfeng Wang, [wjf927@jlu.edu.cn](mailto:wjf927@jlu.edu.cn).

15

16

17

18

19

20

21

22

23 **Abstract**

24 The production of metallo- $\beta$ -lactamases (MBLs) is one of the major mechanisms  
25 adopted by bacterial pathogens to resist carbapenems. One promising strategy to  
26 overcome MBLs-mediated carbapenems resistance is to develop effective inhibitors.  
27 Repurposing approved drugs to restore the efficacy of carbapenems represents an  
28 efficient and cost-effective approach to fight infections caused by carbapenem resistant  
29 pathogens. Here, twelve FDA-approved compounds were screened to neutralize the  
30 ability of NDM-1. Among these compounds, dexrazoxane, embelin, candesartan  
31 cilexetil (CAN) and nordihydroguaiaretic acid (NDGA) were further demonstrated to  
32 inhibit all tested MBLs, and showed an *in vitro* synergistic bactericidal effect with  
33 meropenem against MBLs-producing bacteria. Mechanistic studies revealed that  
34 dexrazoxane, embelin and CAN are metal ion chelating agents, while the inhibition of  
35 NDM-1 by NDGA involves its direct binding with the active region of NDM-1.  
36 Furthermore, dexrazoxane, embelin and CAN and NDGA dramatically rescued the  
37 treatment efficacy of meropenem in three infection models. Our observations indicated  
38 that dexrazoxane, embelin, CAN and NDGA are promising carbapenem adjuvants  
39 against MBLs-positive carbapenem resistant bacterial pathogens.

40

41

42 **Keywords:** Carbapenems, Carbapenem-resistant Gram-negative bacteria, Metallo- $\beta$ -  
43 lactamase, FDA-approved drug library, Drug repurposing

44

## 45 **Introduction**

46       The overuse and misuse of antibiotics has led to the rapid development and  
47 dissemination of antimicrobial resistance (AMR), which is a serious threat to public  
48 health worldwide. Currently, few therapeutic options are available for the treatment of  
49 infections caused by multi-drug resistant (MDR) bacteria, especially “ESKAPE”  
50 pathogens (*Enterococcus faecium*, *Staphylococcus aureus*, *Klebsiella pneumoniae*,  
51 *Acinetobacter baumannii*, *Pseudomonas aeruginosa* and *Enterobacter spp* [1]. It was  
52 estimated that AMR will result in 10 million patient deaths per year by 2050 unless  
53 active and effective actions are mounted [2].

54       Carbapenems are  $\beta$ -lactam antibiotics that are commonly used as last-resort drugs  
55 for the treatment of serious MDR gram-negative bacterial infections [3]. In the past two  
56 decades, the clinical consumption of carbapenems has increased dramatically, which is  
57 inevitably accompanied by the emergence and prevalence of carbapenem-resistant  
58 strains [4]. In particular, carbapenem-resistant *Enterobacteriaceae* (CRE), which has  
59 become a global public threat [5]. The production of an inactivating enzyme,  
60 carbapenemase, is the major resistance mechanism of *Enterobacteriaceae* to  
61 carbapenems [6]. The large numbers of carbapenemases are divided into three major  
62 categories according to their amino acid sequences. Classes A and D carbapenemases  
63 (e.g. KPC and OXA-48) are serine  $\beta$ -lactamases (SBLs), which utilize an active serine  
64 residue to covalently attack the  $\beta$ -lactam ring [7]. Class B carbapenemases represented  
65 by NDM, IMP and VIM are metallo- $\beta$ -lactamases (MBLs), which require zinc ions for  
66 the activation of a water nucleophile to hydrolyse the ring [7, 8]. The global spread of

67 MBLs is particularly problematic and has aroused significant concerns due to their  
68 ability to inactivate almost all clinically approved  $\beta$ -lactams except for aztreonam [9].  
69 In addition, MBLs have great potential for horizontal gene transfer between various  
70 bacterial species through MBLs-bearing plasmids [8]. The SENTRY antimicrobial  
71 surveillance program reported that the detection of MBL genes in CRE isolates were  
72 rapidly increased from 4.3% during 2007-2009 to 12.7% during 2014-2016, among  
73 which NDM was the most predominant type of MBLs, accounting for approximately  
74 10% of the CRE isolates [10].

75 Carbapenem-resistant bacteria including *Acinetobacter baumannii*, *Pseudomonas*  
76 *aeruginosa* and *Enterobacteriaceae* were listed by the World Health Organization  
77 (WHO) in 2019 as the priority pathogens required for new treatment [10, 11].  
78 Compared with the development of novel antibiotics, the discovery of carbapenemase  
79 inhibitors represents a fast and cost-effective alternative approach to restore the  
80 susceptibility of bacteria to carbapenems [12]. The advantages were further  
81 strengthened by advances in rapid detection technologies, enabling fast and accurate  
82 detection of carbapenemase genes [13-15]. Indeed, this strategy has yielded the  
83 successful development of SBL inhibitors. For example, vaborbactam was approved in  
84 2017 for clinical use in combination with meropenem to overcome carbapenem  
85 resistance mediated by the expression of SBLs [16]. However, to date, no MBL  
86 inhibitors have been approved for clinical use to date.

87 Here, we screened 1515 FDA-approved drugs through the nitrocefin hydrolysis  
88 assay, resulting in the identification of 12 compounds that are capable of inhibiting

89 NDM-1 activity. We further confirmed that dexrazoxane, embelin, candesartan cilexetil  
90 (CAN) and nordihydroguaiaretic acid (NDGA) showed significant synergistic  
91 antibacterial effects when used in combination with meropenem against NDM-1  
92 positive bacterial strains. In addition to affecting NDM-1, these compounds also exhibit  
93 broad inhibitory effects on other major types of MBLs, including IMP and VIM. Further  
94 mechanistic studies revealed that dexrazoxane, embelin and CAN are metal ion  
95 chelators, while the inhibition of MBLs by NDGA involves NDGA binding to the active  
96 region of NDM-1, preventing the binding of NDM-1 to its substrate and thereby  
97 inhibiting the activity of NDM-1. Finally, the combination therapy of the compounds  
98 with meropenem restored the treatment efficacy of meropenem in mice infected with  
99 NDM-1 harbouring *E. coli* isolates. Taken together, our study provides additional  
100 options for the treatment of infections caused by MBLs-positive bacterial pathogens.

## 101 **Materials and Methods**

### 102 **Bacterial strains, plasmids, culture methods and reagents**

103 The bacterial strains, plasmids and primers used in this study are listed in  
104 Supplementary **Table S1**, **Table S2** and **Table S3**, respectively. All bacterial strains  
105 were grown on Luria-Bertani (LB) plates or in LB broth. All NDM-1-positive strains  
106 were originated from our previous studies [17]. *E. cloacae* 20710 and *E. cloacae* 20712  
107 were provided by Dr. Yonghong Xiao at Zhejiang University [18]. *A. baumannii* 21 was  
108 provided by Dr. Zhimin Guo at the First Hospital of Jilin University.

109 The full gene sequences of *bla*<sub>IMP-1</sub>, *bla*<sub>VIM-1</sub>, *bla*<sub>KPC-2</sub> and *bla*<sub>OXA-48</sub> were  
110 synthesized by GeneScript (Nanjing, China) and were inserted into pET28a or

111 pETSUMO for protein expression.

112 The FDA-approved drug library was purchased from ApexBio Technology  
113 (Cat#L1021, Houston, TX, USA). Dexrazoxane, embelin, CAN and NDGA were  
114 dissolved in DMSO (Sigma-Aldrich, St. Louis, MO, USA). Meropenem, amoxicillin,  
115 ciprofloxacin, imipenem, erythromycin, chloramphenicol, tetracycline and gentamicin  
116 were obtained from Dalian Meilun Biotechnology Co., Ltd. (Dalian, China).

### 117 **Protein expression and purification**

118 Plasmids derived from pET28a or pETSUMO for protein production were  
119 transformed into *E. coli* strain BL21 (DE3). Transformed *E. coli* was inoculated into  
120 LB broth containing kanamycin (final concentration of 30 µg/mL) and grown to an  
121 OD<sub>600nm</sub> of 0.8 at 37 °C, followed by induction with isopropyl-β-d-thiogalactoside  
122 (IPTG) overnight at 18 °C. Cells were collected by centrifugation and lysed by a  
123 homogenizer (JN-mini, JNBIO, Guangzhou, China). Lysed samples were centrifuged  
124 at 12, 000 rpm for 20 min. NDM-1 and its mutant proteins, IMP-1, VIM-1, KPC-2 and  
125 OXA-48 were purified by nickel affinity chromatography. After washing with lysis  
126 buffer, proteins were eluted with 250 mM imidazole and dialyzed twice in a buffer  
127 containing 20 mM Tris-HCl (pH 7.5), 150 mM NaCl, 10% glycerol and 1 mM  
128 dithiothreitol (DTT). Protein concentrations were measured by the Bradford Protein  
129 Assay (Bio-Rad).

### 130 **Nitrocefin hydrolysis assays**

131 Nitrocefin hydrolysis assays were determined as described previously [17] in the  
132 presence of the indicated concentrations (from 0 to 64 µg/mL) of different compounds.

133 The results were read in 96-well plates at 37 °C using a microplate reader at 492 nm  
134 (SYNERGY H1, BioTek). The inhibitory effects of the identified active compound on  
135 other carbapenemases (NDM-3, NDM-9, IMP-1, VIM-1, KPC-2 and OXA-48) were  
136 tested as described above using nitrocefin as the substrate.

### 137 **Determination of the MIC and FICI**

138 MIC values were determined according to the broth microdilution guidelines of  
139 the Clinical and Laboratory Standards Institute (CLSI). After the tested strains were  
140 diluted with LB to a final concentration of  $5 \times 10^5$  CFUs/mL, various concentrations of  
141 meropenem (0-256 µg/mL) and increasing concentrations of inhibitors (0-64 µg/mL)  
142 were added to the sterile 96-well plate, and further incubated for 18-24 h at 37 °C. The  
143 lowest concentration with no visible growth was considered as the MIC value. The  
144 synergistic effect of antibiotics and inhibitors was assessed by determining the  
145 fractional inhibitory concentration (FIC) index values according to the formula:  
146  $FICI = (\text{MIC of inhibitors in combination} / \text{MIC of inhibitors}) + (\text{MIC of antibiotics in}$   
147  $\text{combination} / \text{MIC of antibiotics}).$

### 148 **Combined disc tests**

149 Overnight bacterial culture was diluted with LB broth to an  $OD_{600\text{nm}}$  of 0.1. 200  
150 µL of the bacterial suspension was plated on the LB plates. 10 µL of each inhibitor was  
151 added to the discs that containing 10 µg meropenem (Oxoid Ltd. Basingstoke, United  
152 Kingdom). The discs were placed in the center of the LB plates and incubated at 37 °C  
153 for 24 h. Then, the inhibition zone of different treatments was measured and recorded.

### 154 **Time-dependent killing**

155 To determine the *in vitro* time-dependent killing of NDM-1 producing bacteria by  
156 meropenem, bacterial strains were incubated with inhibitors (32 or 64 µg/mL),  
157 meropenem (2 or 8 µg/mL), or inhibitors (32 or 64 µg/mL) in combination with  
158 meropenem (2 or 8 µg/mL) at 37 °C. At the indicated time points, samples of different  
159 treatments were collected, diluted and plated on LB plates. The CFU values were  
160 calculated after incubation overnight at 37 °C.

### 161 **Inductively coupled plasma-mass spectrometry (ICP-MS)**

162 ICP-MS was performed as described earlier [19] to investigate the potential ability  
163 of the identified NDM-1 inhibitors to chelate zinc ions. Briefly, in order to remove the  
164 contained metals, freshly purified NDM-1 protein was exchanged in ICP-MS buffer (20  
165 mM HEPES, 100 mM NaCl, pH 7.5) overnight at 4 °C in a 15 kDa cutoff dialysis tubing.  
166 The NDM-1 concentration was adjusted to 5 mg/mL prior to mixing with different  
167 concentrations of inhibitors and incubating for 3 h at room temperature with shaking.  
168 The NDM-1-inhibitor samples were then dialyzed overnight at 4 °C with ICP-MS  
169 buffer by the 12-14 kDa cutoff D-tube dialyzer mini (EMD Biosciences) microdialysis  
170 cassettes. The samples were diluted to 1 mg/mL with ICP-MS buffer and then diluted  
171 40-fold with an internal standard containing 10 ng/mL Sc<sup>45</sup> and 1% nitric acid. Then,  
172 the samples were analysed by ICP-MS (XSERIES 2, Thermo Fisher Scientific).

### 173 **Metal ions restoration assays**

174 NDM-1 was pretreated with various concentrations of the inhibitors at 37 °C for  
175 10 min, followed by the addition of metal salts (ZnSO<sub>4</sub>, MgSO<sub>4</sub> and CaCl<sub>2</sub>) and  
176 nitrocefin to a final volume of 200 µL and an incubation for 30 min at 37 °C. Then, the



177 absorbance at 492 nm of each sample was measured to calculate the percent residual  
178 activity.

### 179 **Molecular dynamics simulation**

180 Molecular dynamics simulations of the NDGA-NDM-1 complexes were  
181 performed using the Gromacs 4.5.2 software package [20] based on the GRO MOS96  
182 54a7 force field and TIP3P water model. The molecular mechanics/Poisson-Boltzmann  
183 surface area (MM-PBSA) method was used to calculate the binding free energy after  
184 simulation as described previously [17].

### 185 **Secondary structure determination of NDM-1 by circular dichroism (CD)** 186 **spectroscopy**

187 The CD spectrum of NDM-1 was analysed using a CD spectrophotometer (MOS-  
188 500; Bio-Logic, France) [21]. 200 µg of NDM-1 was incubated with 32 µg/mL of each  
189 inhibitor. Then, the secondary structure of NDM-1 (0.2 mg/mL) was determined at  
190 room temperature using a quartz cuvette with an optical distance of 1 mm. The scan  
191 wavelength range was 190 to 250 nm with a resolution of 0.2 nm and a bandwidth of 1  
192 nm. The BeStSel web server was used to analyse the secondary structure measurements  
193 of each sample.

### 194 **Plasmid stability**

195 NDM-1-positive *E. coli*, *K. pneumoniae* and *A. baumannii* strains were grown in  
196 LB broth overnight with constant shaking in the presence or absence of inhibitors (32  
197 µg/mL). Bacteria were diluted and plated on blank LB plates or LB plates containing  
198 30 µg/mL of kanamycin and incubated at 37 °C for CFU determination.

## 199 **Antibodies and Immunoblotting**

200 Polyclonal antibodies against NDM-1 were produced by immunization of mice  
201 with recombinant His<sub>6</sub>-NDM-1 (AbMax Biotechnology Co., Ltd., Beijing, China).  
202 NDM-1-positive bacterial strains were cultured in the presence of increasing  
203 concentrations of inhibitors at 37 °C for 12 h. Bacterial cultures were centrifuged at  
204 12,000 rpm for 5 min, resuspended in 1× loading buffer and subjected to SDS-PAGE.  
205 The proteins were transferred to polyvinylidene fluoride (PVDF) membranes followed  
206 by a blocking step using 5% nonfat milk. Membranes were incubated with primary  
207 antibody (1: 2000) for 2 h and secondary antibody for 1 h at room temperature. The  
208 expression of NDM-1 was detected by the Odyssey® CLx Imaging System (Li-Cor).

## 209 **Ethics statement**

210 All animal studies were conducted according to the experimental practices and  
211 standards approved by the Institutional Animal Care and Use Committee of Jilin  
212 University (ALKT202102001). The laboratory animal usage license number is SYXK-  
213 2021-0001, as certified by the Department of Science & Technology of Jilin Province.  
214 All surgery was performed under sodium pentobarbital anesthesia, and every effort was  
215 made to minimize suffering.

## 216 **Mouse infection models**

217 Female BALB/c mice (6-8 weeks old, approximately 20 g) were used in this study.  
218 Mice were injected intraperitoneally with *E. coli* ZJ487 at a dose of 2×10<sup>8</sup> CFUs for  
219 survival experiments, intramuscularly injected at a dose of 2×10<sup>7</sup> CFUs for bacterial  
220 burden experiments on thigh muscles or inoculated in the left nare (5×10<sup>7</sup> CFUs) to

221 generate a pneumonia model. For all experiments, after the bacterial challenge, mice  
222 were given subcutaneous injections of DMSO, meropenem (10 mg/kg), inhibitors (80  
223 mg/kg), or a combination of meropenem (10 mg/kg) with inhibitors (80 mg/kg) every  
224 12 h. The infected mice were monitored until 96 h post infection for survival analysis.  
225 For the thigh muscle and pneumonia models, mice were euthanized 72 h post infection  
226 and the thigh muscles and lungs were harvested. Organs were placed into 1 mL of  
227 sterilized PBS and homogenized. Then, the suspension was diluted with PBS and plated  
228 on an LB plate for CFU enumeration. In addition, lungs were placed into 4% formalin,  
229 stained with haematoxylin and eosin and scanned with a digital slide scanner  
230 (Pannoramic MIDI, 3DHISTECH Ltd).

### 231 **Statistical analysis**

232 The statistical analysis was performed by GraphPad Prism 5 and SPSS software.  
233 All the data are presented as the mean  $\pm$  SD. For *in vitro* studies, the statistical analysis  
234 was calculated by the unpaired two tailed Student's *t*-tests; for *in vivo* experiments, the  
235 statistical significance was determined using the log-rank (Mantel-Cox) test (survival  
236 rates) and Mann-Whitney U test (tissue bacterial load).  $P < 0.05$  was considered as  
237 significant difference, with \* indicating  $P < 0.05$  and \*\* indicating  $P < 0.01$ .

238

### 239 **Results**

240 **Four new NDM-1 inhibitors restore the sensitivity of NDM-1-positive bacterial**  
241 **strains to meropenem**

242 To probe for the potential application of an existing drug as an NDM-1 inhibitor,  
243 we screened a commercially available FDA-approved drug library comprising 1515  
244 compounds for their ability to inhibit the hydrolysis of nitrocefin to chromogenic  
245 cephalosporin by purified NDM-1 enzyme. The initial screening resulted in the  
246 identification of 12 compounds that were capable of inhibiting the enzymatic activity  
247 of NDM-1, with IC<sub>50</sub> values ranging from 1.77 µg/mL to 10.71 µg/mL (**Figure 1** and  
248 **Table S4**). None of the compounds showed antibacterial activity against the tested  
249 gram-negative bacterial strains, as evident by all the MICs being no lower than 128  
250 µg/mL. We further determined the potential synergistic effects of the compounds with  
251 carbapenems. Only four compounds (dexrazoxane, embelin, CAN and NDGA)  
252 significantly restored the susceptibility of meropenem against engineered *E. coli* strains  
253 expressing NDM-1 (BL21-pET28a-SP-NDM-1) or carbapenem-resistant bacterial  
254 isolates harbouring *bla*<sub>NDM-1</sub>, as indicated by an FICI less than 0.5 (**Figure 2A** and  
255 **Tables S5-S8**). In addition, the combined disk tests also showed significant synergy  
256 between meropenem and the inhibitors. Compared to the disks containing meropenem  
257 alone, the diameter of the inhibition zone was significantly larger in disks containing  
258 both meropenem and each tested inhibitor (**Figure 2B** and **Figure2- figure supplement**  
259 **1**). Moreover, the time-dependent killing curves were determined to investigate their  
260 synergistic bactericidal activity. We found that the combinations led to almost complete  
261 bacterial killing within 4 to 10 h for engineered *E. coli* BL21 expressing NDM-1 as  
262 well as the clinical *E. coli* isolate ZJ487 (**Figure 2C**). Thus, our results identified that  
263 dexrazoxane, embelin, CAN and NDGA represent effective NDM-1 inhibitors

264 displaying synergistic antibacterial activity against NDM-1-positive bacteria with  
265 meropenem.

### 266 **Dexrazoxane, embelin, CAN and NDGA are broad-spectrum MBLs inhibitors**

267 To verify the specificity of the NDM-1 inhibitors identified from the FDA-  
268 approved drug library, we purified a series of carbapenemases and tested their  
269 enzymatic activity in the presence of dexrazoxane, embelin, CAN and NDGA. Not  
270 surprisingly, all the inhibitors displayed potent inhibitory effects on the NDM-3 and  
271 NDM-9, the NDM-1 variants that have only a single amino acid mutation (**Figure 3A-**  
272 **B**). The inhibitors also showed increased antibacterial activity of meropenem against  
273 clinical isolates expressing NDM-9 (**Tables S5-S8**). Furthermore, the ability of two  
274 other major types of MBLs, IMP-1 and VIM-1, to hydrolyse nitrocefin was  
275 significantly suppressed by these compounds (**Figure 3C-D**). Therefore, dexrazoxane,  
276 embelin, CAN and NDGA could act as broad-spectrum MBLs inhibitors. Indeed, they  
277 were able to rescue the susceptibility of meropenem against carbapenem-resistant *E.*  
278 *cloacae* isolates mediated by the production of VIM-1 (**Tables S5-S8**). Surprisingly,  
279 embelin, CAN and NDGA but not dexrazoxane also exhibited varying degrees of  
280 inhibition of class A (KPC-2) and class D (OXA-48) carbapenemases (**Figure 3- figure**  
281 **supplement 1A-B**). Taken together, these results indicated that dexrazoxane, embelin,  
282 CAN and NDGA are broad-spectrum MBLs inhibitors.

### 283 **Dexrazoxane, embelin and CAN act as metal ion chelators to inhibit the activity** 284 **of NDM-1**

285 To gain insights into the mechanisms adopted by the inhibitors to neutralize NDM-  
286 1, we first added excessive zinc ions in the nitrocefin hydrolysis reactions in the  
287 presence or absence of inhibitors. The efficacy of dexrazoxane, embelin and CAN in  
288 suppressing NDM-1 enzymatic activity was significantly reduced with the addition of  
289 500  $\mu\text{M}$  of  $\text{ZnSO}_4$  (**Figure 4A-B**). Additionally, supplementation with other divalent  
290 metal ions (magnesium and calcium ions) in the reaction resulted in a similar restoration  
291 of NDM-1 activity (**Figure 4C-D**). Therefore, the inhibition of NDM-1 by dexrazoxane,  
292 embelin and CAN may be involved in a metal depletion mechanism. Indeed, after  
293 incubation of NDM-1 with 8 or 32  $\mu\text{g}/\text{mL}$  of dexrazoxane, embelin and CAN, the zinc  
294 ion concentrations associated with NDM-1 were significantly reduced as determined  
295 by ICP-MS (**Figure 4E**). Taken together, dexrazoxane, embelin and CAN function as  
296 metal chelating agents to suppress the enzymatic activity of MBLs. In contrast, we did  
297 not observe either restoration of hydrolysing activity by supplementation with metal  
298 ions or the loss of zinc ions in NDM-1 inactivated by NDGA (**Figure 4A-E**), suggesting  
299 a different inhibitory mechanism employed by NDGA.

### 300 **A direct engagement of NDGA inhibits NDM-1 activity**

301 To further clarify the mechanism of NDGA on the inhibition of NDM-1, we carried  
302 out molecular dynamics simulations. A complex MD simulation of the NDM-1-NDGA  
303 complex was aimed to explore the binding mode (**Figure 5A**). The root mean square  
304 deviation (RMSD) of the complex fluctuated between 0.3 and 0.35 nm after 20 ns,  
305 which indicated that the last 80 ns period of the simulation was suitable for the  
306 subsequent analysis (**Figure 5B**). Energy decomposition analysis confirmed that the

307 side chains of Ile35, Cys208, Lys211, Asp212, Ala215, Met248 and His250 could bind  
308 to NDGA via van der Waals interactions (**Figure 5C**). Moreover, the distance between  
309 different residues of NDM-1 and NDGA was analysed. The Ile35, Lys211 and His250  
310 in the NDM-1-binding region are closer to NDGA than other residues (distance < 0.4  
311 nm) (**Figure 5D**). The simulated residues (Ile35, Lys211 and His250) that had the  
312 highest binding energy were selected for site-directed mutagenesis. Single mutations of  
313 Ile35, Lys211 and His250 into alanine did not affect the enzymatic activity of NDM-1.  
314 However, the inhibitory effect of NDGA on NDM-1<sub>I35A</sub> and NDM-1<sub>K211A</sub> but not NDM-  
315 1<sub>H250A</sub> was significantly reduced (**Figure 5E**). Collectively, we speculated that NDGA  
316 could bind Ile35 and Lys211 to inhibit the activity of NDM-1.

### 317 **Alteration of the secondary structure of NDM-1 by dexrazoxane, embelin, CAN** 318 **and NDGA**

319 In addition to the aforementioned mechanisms, we further detected whether these  
320 inhibitors affected the secondary structure of NDM-1 by CD spectroscopy. In the  
321 absence of inhibitors, the NDM-1 contains 52.5%  $\alpha$ -helix and 22.0% turn  
322 conformations. However, following treatment of NDM-1 with 32  $\mu$ g/mL of the  
323 inhibitors, the percentage of  $\alpha$ -helix conformation was reduced to 0%, 18.8%, 0% and  
324 17.2% for dexrazoxane, embelin, CAN and NDGA, respectively (**Figure 6A**). The  
325 percentage of turn conformation was increased to 76.7%, 54.3%, 70.3% and 46.1%,  
326 respectively. Additionally, NDGA-treated NDM-1 maintained a highly consistent  
327 conformational composition with untreated NDM-1, and only the proportion of  
328 different conformations is changed, while the conformation of dexrazoxane, embelin or

329 CAN-treated NDM-1 (including heat inactivated NDM-1) changed dramatically  
330 compared with that of untreated NDM-1 (**Figure 6A**). With the addition of inhibitors,  
331 the negative ellipticity of the CD spectrum of NDM-1 decreased, and the negative peak  
332 at 222 nm was shifted to higher wavenumbers accompanied by a shortened amplitude  
333 (**Figure 6B**). Such conformational changes may be attributed to the direct interaction  
334 between inhibitors and NDM-1 or the indirect influence of zinc ions depletion within  
335 NDM-1 caused by the inhibitors. However, the currently available structural biology  
336 data did not clearly clarify the importance of zinc ion on the structural stability of NDM-  
337 1. Thus, our results indicated that treatment with dexrazoxane, embelin, CAN and  
338 NDGA measurably altered the secondary structure of NDM-1.

### 339 **Dexrazoxane and embelin reduce the protein stability of NDM-1**

340 In addition to the direct inhibition of NDM-1, we further assessed whether these  
341 compounds affect the production of NDM-1. Bacterial strains harbouring plasmid-  
342 borne *bla*<sub>NDM-1</sub> were treated with increasing concentrations of inhibitors, and the total  
343 cell lysates were subsequently subjected to immunoblotting to determine the protein  
344 level of NDM-1. We found that the amount of NDM-1 was remarkably reduced in  
345 response to 32 µg/mL of dexrazoxane and embelin but not NDGA or CAN (**Figure 7A**  
346 and **Figure 7- figure supplement 1A**). The reduced level of NDM-1 did not result from  
347 the loss of plasmid stability by the effect of dexrazoxane and embelin (**Figure 7- figure**  
348 **supplement 2**). It was previously reported earlier that zinc ion depletion could  
349 accelerate the degradation of MBLs in bacteria [22]. Hence, the decreased amount of  
350 NDM-1 in the tested bacterial isolates could be the consequence of metal ion removal



351 by dexrazoxane and embelin. Indeed, we observed a restored amount of NDM-1 in the  
352 sample with an addition of excessive zinc ions in bacteria treated with 32 µg/mL of  
353 dexrazoxane and embelin (**Figure 7B** and **Figure 7- figure supplement 1B**). CAN,  
354 another metal ion chelator, was not observed detected to reduce the amount of NDM-1  
355 at the tested concentration, probably due to its weaker chelating capability or relatively  
356 poor permeability to bacterial cells, which failed to efficiently remove zinc ions  
357 associated with NDM-1. Taken together, our data suggested that deletion of zinc ions  
358 by dexrazoxane and embelin could induce the degradation of NDM-1.

### 359 **Dexrazoxane, embelin, CAN and NDGA restore meropenem activity *in vivo***

360 Given the potent inhibition of dexrazoxane, embelin, CAN and NDGA on the  
361 enzymatic activity of NDM-1, as well as their excellent *in vitro* synergistic bactericidal  
362 activity against NDM-1 producing bacterial pathogens when used in combination with  
363 meropenem, we further investigated the potential application of these inhibitors to  
364 overcome carbapenem resistance *in vivo* and restore the treatment efficacy of  
365 meropenem in the clinical settings. We established three mouse infection models to  
366 assess the *in vivo* therapeutic effects of the combined therapy. In the lethal systemic  
367 infection model, all mice infected with *E. coli* ZJ487 treated with PBS or meropenem  
368 monotherapy died within 36 h post-infection. However, the combined therapy of  
369 meropenem with the inhibitors resulted in 33.33%, 50%, 66.67% and 33.33% survival  
370 for dexrazoxane, NDGA, embelin and CAN, respectively (**Figure 8A**). Surprisingly,  
371 embelin alone can also increase the survival rate of mice to 33%, which may be due to  
372 its unexplored pharmacological actions on either mammalian hosts or bacteria cells.

373 The therapeutic advantages of the combined therapy were also supported by the mouse  
374 thigh muscle infection model. The bacterial load was reduced significantly in infected  
375 mice treated with meropenem and the individual NDM-1 inhibitors (**Figure 8- figure**  
376 **supplement 1A**). Moreover, we tested the treatment efficacy of the combination  
377 therapy in a mouse pneumonia infection model. Co-therapy of mice with meropenem  
378 and NDM-1 inhibitors resulted in strikingly lower bacterial counts in the lungs (**Figure**  
379 **8- figure supplement 1B**) and as well as the marked remission of pulmonary  
380 inflammation as evidenced by less inflammatory factor infiltration in the alveolar space  
381 (**Figure 8B**). Together, these observations confirmed the potential utilization of  
382 dexrazoxane, embelin, CAN and NDGA to rescue carbapenem activity *in vivo* against  
383 infections caused by NDM-1 producing bacterial pathogens.

384

## 385 **Discussion**

386 Carbapenems are still the last-resort antibiotics to control serious infectious  
387 diseases caused by MDR gram-negative bacterial pathogens. However, the  
388 development of carbapenem resistance mediated by carbapenemase has greatly limited  
389 the clinical use of carbapenems. Therefore, it is urgent to develop novel treatment  
390 strategies to address infections caused by carbapenem resistant bacteria. In recent  
391 decades, many scientific groups have concentrated on the identification of novel  
392 effective  $\beta$ -lactamase inhibitors, and fortunately resulting in significant progress [23].  
393 The most striking achievements are the discovery of diazabicyclooctanones (DBOs),  
394 non- $\beta$ -lactam  $\beta$ -lactamase inhibitors [24]. Recently, two DBOs (avibactam and

395 relebactam) have been approved for clinical use in combination with  $\beta$ -lactams such as  
396 ceftazidime, imipenem and cilastatin [25-27]. Moreover, two novel DBO-type  
397 inhibitors, zidebactam and nacubactam, which have high affinity for penicillin-binding  
398 protein 2 and potent inhibition of  $\beta$ -lactamase, are under investigation in clinical trials  
399 combined with  $\beta$ -lactams [28-30]. In addition to DBOs, another type of non- $\beta$ -lactam  
400  $\beta$ -lactamase inhibitor, vaborbactam, which contains a cyclic boronic acid  
401 pharmacophore, was available on the market and used in conjunction with meropenem  
402 [31]. Obviously, the clinical application of DBOs and vaborbactam expanded the  
403 therapeutic options for lethal diseases by gram-negative bacteria. However, both DBOs  
404 and vaborbactam are narrow-spectrum inhibitors and are only active towards SBLs but  
405 not MBLs [24, 32]. Hence, the identification of inhibitors against MBLs is highly  
406 urgent and represents the major challenge in the field of  $\beta$ -lactamase inhibitor  
407 development. A great number of compounds such as thiols, thioesters,  
408 azolylthioacetamide, carboxylic acids, cyclic boronates and aspergillomarasmine A  
409 showed activity to inhibit MBLs by diverse mechanisms [19, 33]. Despite of the  
410 worldwide academic efforts, no MBLs inhibitors are close to clinical use.

411       Compared to the *de novo* development of an entirely new drug for a specific  
412 disease, drug repurposing, which aims to identify novel applications for existing drugs,  
413 has gained increasing interest during the last decade [34, 35]. This strategy exhibits  
414 significant advantages since the repurposed drugs already have pharmacokinetic and  
415 safety assessment data, which can greatly reduce the timeline and cost of development.  
416 Here we employed the repurposing approach and found four NDM-1 inhibitors from

417 the FDA-approved drugs. Dexrazoxane is used mainly as an anti-tumor adjuvant drug  
418 to alleviate the cardiotoxicity induced by anthracycline [36]; NDGA is an antioxidant  
419 applied mostly in the food industry [37]; embelin, a natural compound isolated from  
420 *Embeliaribes*, is a well-known antagonist for X-linked inhibitor of apoptosis protein  
421 (XIAP) used for the treatment of various cancers [38]; CAN is a potent blocker of  
422 angiotensin II receptor approved to treat hypertension in adults [39]. These four  
423 inhibitors showed broad-spectrum inhibitory effects on MBLs either by chelating zinc  
424 ions (dexrazoxane, embelin and CAN) or by directly engaging MBLs (NDGA). When  
425 used in combination with meropenem, these inhibitors displayed potent synergistic  
426 bactericidal effects on MBLs-producing bacteria *in vitro*. In addition, combined therapy  
427 with meropenem and inhibitors also exhibits synergistic treatment advantages against  
428 infections induced by bacteria expressing NDM-1.

429 It was noted that an earlier study also reported embelin as an NDM-1 inhibitor  
430 from an enzymatic-based screening of naturally occurring chemicals [40]. Here, we  
431 further demonstrated that embelin functions as a potent chelating agent to directly  
432 deplete zinc ions from NDM-1, and further clarified its potential application in  
433 combined therapy with meropenem against MBLs-harboring bacteria in various  
434 animal infection models.

## 435 **Conclusion**

436 Our data demonstrated that the FDA-approved dexrazoxane, embelin, CAN and  
437 NDGA possess excellent synergistic activity with meropenem against carbapenem-  
438 resistant bacteria mediated by MBLs both *in vitro* and *in vivo*. Our observations together

439 with the established safety assessments indicate the great potential of repurposing these  
440 drugs as antibiotic adjuvants to fight lethal infections caused by MBLs-producing  
441 bacterial pathogens.

442

#### 443 **Acknowledgements**

444 The authors thank Professor Yonghong Xiao (Zhejiang University, China) for  
445 strains *E. cloacae* 20710 and 20712, and thank Dr. Zhimin Guo (the First Hospital of  
446 Jilin University, China) for *A. baumannii* 21. This work was supported by the National  
447 Key Research and Development Program of China (2021YFD1801000), the National  
448 Natural Science Foundation of China (grant nos. 81861138046 and 32172912).

449

#### 450 **Conflicts of interest**

451 All authors declare no conflict of interest.

452

453

454 **References**

- 455 1. De Oliveira DMP, Forde BM, Kidd TJ, Harris PNA, Schembri MA, Beatson SA,  
456 et al. Antimicrobial Resistance in ESKAPE Pathogens. *Clin Microbiol Rev.* 2020; 33.
- 457 2. de Kraker ME, Stewardson AJ, Harbarth S. Will 10 Million People Die a Year due  
458 to Antimicrobial Resistance by 2050? *PLoS Med.* 2016; 13: e1002184.
- 459 3. McKenna M. Antibiotic resistance: the last resort. *Nature.* 2013; 499: 394-6.
- 460 4. Zequinao T, Telles JP, Gasparetto J, Tuon FF. Carbapenem stewardship with  
461 ertapenem and antimicrobial resistance-a scoping review. *Rev Soc Bras Med Trop.*  
462 2020; 53: e20200413.
- 463 5. Patel G, Bonomo RA. "Stormy waters ahead": global emergence of  
464 carbapenemases. *Front Microbiol.* 2013; 4: 48.
- 465 6. Nordmann P, Poirel L. Epidemiology and Diagnostics of Carbapenem Resistance  
466 in Gram-negative Bacteria. *Clin Infect Dis.* 2019; 69: S521-S8.
- 467 7. Queenan AM, Bush K. Carbapenemases: the versatile beta-lactamases. *Clin*  
468 *Microbiol Rev.* 2007; 20: 440-58, table of contents.
- 469 8. Yong D, Toleman MA, Giske CG, Cho HS, Sundman K, Lee K, et al.  
470 Characterization of a new metallo-beta-lactamase gene, bla(NDM-1), and a novel  
471 erythromycin esterase gene carried on a unique genetic structure in *Klebsiella*  
472 *pneumoniae* sequence type 14 from India. *Antimicrob Agents Chemother.* 2009; 53:  
473 5046-54.
- 474 9. van Duin D, Doi Y. The global epidemiology of carbapenemase-producing  
475 *Enterobacteriaceae*. *Virulence.* 2017; 8: 460-9.

- 476 10. Castanheira M, Deshpande LM, Mendes RE, Canton R, Sader HS, Jones RN.  
477 Variations in the Occurrence of Resistance Phenotypes and Carbapenemase Genes  
478 Among Enterobacteriaceae Isolates in 20 Years of the SENTRY Antimicrobial  
479 Surveillance Program. *Open Forum Infect Dis.* 2019; 6: S23-S33.
- 480 11. WHO. Global Priority List of Antibiotic-Resistant Bacteria to Guide Research,  
481 Discovery, and Development of New Antibiotics. . 2020.
- 482 12. Bush K, Bradford PA. Interplay between beta-lactamases and new beta-lactamase  
483 inhibitors. *Nat Rev Microbiol.* 2019; 17: 295-306.
- 484 13. Pasteran F, Gonzalez LJ, Albornoz E, Bahr G, Vila AJ, Corso A. Triton Hodge Test:  
485 Improved Protocol for Modified Hodge Test for Enhanced Detection of NDM and Other  
486 Carbapenemase Producers. *J Clin Microbiol.* 2016; 54: 640-9.
- 487 14. Kumar N, Singh VA, Beniwal V, Pottathil S. Modified Carba NP Test: Simple and  
488 rapid method to differentiate KPC- and MBL-producing *Klebsiella* species. *J Clin Lab*  
489 *Anal.* 2018; 32: e22448.
- 490 15. Howard JC, Creighton J, Ikram R, Werno AM. Comparison of the performance of  
491 three variations of the Carbapenem Inactivation Method (CIM, modified CIM [mCIM]  
492 and in-house method (iCIM)) for the detection of carbapenemase-producing  
493 Enterobacterales and non-fermenters. *J Glob Antimicrob Resist.* 2020; 21: 78-82.
- 494 16. Zhanel GG, Lawrence CK, Adam H, Schweizer F, Zelenitsky S, Zhanel M, et al.  
495 Imipenem-Relebactam and Meropenem-Vaborbactam: Two Novel Carbapenem-beta-  
496 Lactamase Inhibitor Combinations. *Drugs.* 2018; 78: 65-98.
- 497 17. Liu S, Zhang J, Zhou Y, Hu N, Li J, Wang Y, et al. Pterostilbene restores

- 498 carbapenem susceptibility in New Delhi metallo-beta-lactamase-producing isolates by  
499 inhibiting the activity of New Delhi metallo-beta-lactamases. *Br J Pharmacol.* 2019;  
500 176: 4548-57.
- 501 18. Zhou K, Yu X, Zhou Y, Song J, Ji Y, Shen P, et al. Detection of an In104-like  
502 integron carrying a blaIMP-34 gene in *Enterobacter cloacae* isolates co-producing IMP-  
503 34 and VIM-1. *J Antimicrob Chemother.* 2019; 74: 2812-4.
- 504 19. King AM, Reid-Yu SA, Wang W, King DT, De Pascale G, Strynadka NC, et al.  
505 Aspergillomarasmine A overcomes metallo-beta-lactamase antibiotic resistance.  
506 *Nature.* 2014; 510: 503-6.
- 507 20. Hess B, Kutzner C, van der Spoel D, Lindahl E. GROMACS 4: Algorithms for  
508 Highly Efficient, Load-Balanced, and Scalable Molecular Simulation. *Journal of*  
509 *chemical theory and computation.* 2008; 4: 435-47.
- 510 21. Zhou Y, Guo Y, Wen Z, Ci X, Xia L, Wang Y, et al. Isoalantolactone Enhances the  
511 Antimicrobial Activity of Penicillin G against *Staphylococcus aureus* by Inactivating  
512 beta-lactamase during Protein Translation. *Pathogens.* 2020; 9.
- 513 22. Sychantha D, Rotondo CM, Tehrani K, Martin NI, Wright GD.  
514 Aspergillomarasmine A inhibits metallo-beta-lactamases by selectively sequestering  
515 Zn(2). *J Biol Chem.* 2021; 297: 100918.
- 516 23. Tooke CL, Hinchliffe P, Bragginton EC, Colenso CK, Hirvonen VHA, Takebayashi  
517 Y, et al. beta-Lactamases and beta-Lactamase Inhibitors in the 21st Century. *J Mol Biol.*  
518 2019; 431: 3472-500.
- 519 24. de Sousa Coelho F, Mainardi JL. The multiple benefits of second-generation beta-



- 520 lactamase inhibitors in treatment of multidrug-resistant bacteria. *Infect Dis Now*. 2021;  
521 51: 510-7.
- 522 25. Giri P, Patel H, Srinivas NR. Review of Clinical Pharmacokinetics of Avibactam,  
523 A Newly Approved non-beta lactam beta-lactamase Inhibitor Drug, In Combination  
524 Use With Ceftazidime. *Drug Res (Stuttg)*. 2019; 69: 245-55.
- 525 26. Campanella TA, Gallagher JC. A Clinical Review and Critical Evaluation of  
526 Imipenem-Relebactam: Evidence to Date. *Infect Drug Resist*. 2020; 13: 4297-308.
- 527 27. McCarthy MW. Clinical Pharmacokinetics and Pharmacodynamics of Imipenem-  
528 Cilastatin/Relebactam Combination Therapy. *Clin Pharmacokinet*. 2020; 59: 567-73.
- 529 28. Moya B, Barcelo IM, Bhagwat S, Patel M, Bou G, Papp-Wallace KM, et al. WCK  
530 5107 (Zidebactam) and WCK 5153 Are Novel Inhibitors of PBP2 Showing Potent  
531 "beta-Lactam Enhancer" Activity against *Pseudomonas aeruginosa*, Including  
532 Multidrug-Resistant Metallo-beta-Lactamase-Producing High-Risk Clones.  
533 *Antimicrob Agents Chemother*. 2017; 61.
- 534 29. Livermore DM, Mushtaq S, Warner M, Vickers A, Woodford N. In vitro activity of  
535 cefepime/zidebactam (WCK 5222) against Gram-negative bacteria. *J Antimicrob*  
536 *Chemother*. 2017; 72: 1373-85.
- 537 30. Mallalieu NL, Winter E, Fettner S, Patel K, Zwanziger E, Attley G, et al. Safety  
538 and Pharmacokinetic Characterization of Nacubactam, a Novel beta-Lactamase  
539 Inhibitor, Alone and in Combination with Meropenem, in Healthy Volunteers.  
540 *Antimicrob Agents Chemother*. 2020; 64.
- 541 31. Wu G, Cheon E. Meropenem-vaborbactam for the treatment of complicated urinary

- 542 tract infections including acute pyelonephritis. *Expert Opin Pharmacother.* 2018; 19:  
543 1495-502.
- 544 32. Lomovskaya O, Sun D, Rubio-Aparicio D, Nelson K, Tsivkovski R, Griffith DC,  
545 et al. Vaborbactam: Spectrum of Beta-Lactamase Inhibition and Impact of Resistance  
546 Mechanisms on Activity in Enterobacteriaceae. *Antimicrob Agents Chemother.* 2017;  
547 61.
- 548 33. Nagulapalli Venkata KC, Ellebrecht M, Tripathi SK. Efforts towards the inhibitor  
549 design for New Delhi metallo-beta-lactamase (NDM-1). *Eur J Med Chem.* 2021; 225:  
550 113747.
- 551 34. Pushpakom S, Iorio F, Eyers PA, Escott KJ, Hopper S, Wells A, et al. Drug  
552 repurposing: progress, challenges and recommendations. *Nat Rev Drug Discov.* 2019;  
553 18: 41-58.
- 554 35. Peyclit L, Baron SA, Rolain JM. Drug Repurposing to Fight Colistin and  
555 Carbapenem-Resistant Bacteria. *Front Cell Infect Microbiol.* 2019; 9: 193.
- 556 36. Popelova O, Sterba M, Haskova P, Simunek T, Hroch M, Guncova I, et al.  
557 Dexrazoxane-afforded protection against chronic anthracycline cardiotoxicity in vivo:  
558 effective rescue of cardiomyocytes from apoptotic cell death. *Br J Cancer.* 2009; 101:  
559 792-802.
- 560 37. Peralta I, Marrassini C, Filip R, Alonso MR, Anesini C. Food preservation by  
561 *Larrea divaricata* extract: participation of polyphenols. *Food Sci Nutr.* 2018; 6: 1269-  
562 75.
- 563 38. Sheng Z, Ge S, Gao M, Jian R, Chen X, Xu X, et al. Synthesis and Biological

564 Activity of Embelin and its Derivatives: An Overview. *Mini Rev Med Chem.* 2020; 20:  
565 396-407.

566 39. Sawhney N, Patel MK, Schachter M, Hughes AD. Inhibition of proliferation by  
567 heparin and expression of p53 in cultured human vascular smooth muscle cells. *J Hum*  
568 *Hypertens.* 1997; 11: 611-4.

569 40. Ning NZ, Liu X, Chen F, Zhou P, Hu L, Huang J, et al. Embelin Restores  
570 Carbapenem Efficacy against NDM-1-Positive Pathogens. *Front Microbiol.* 2018; 9:  
571 71.

572

573

574 **Tables**

575 **Table S1. Bacterial strains used in this study.**

| <b>Bacterial Strains</b>               | <b>Source</b> | <b>Identifier</b> |
|----------------------------------------|---------------|-------------------|
| <i>E. coli</i> ATCC25922               | ATCC          | 25922             |
| <i>E. coli</i> BL21 (DE3)              | NEB           | CAT#C25271        |
| <i>E. coli</i> pET28a-SP-NDM-1         | This study    | N/A               |
| <i>E. coli</i> ZJ487<br>(NDM-1)        | [1]           | N/A               |
| <i>E. coli</i> ZC-YN3<br>(NDM-1)       | [1]           | N/A               |
| <i>E. coli</i> ZC-YN7<br>(NDM-9)       | [1]           | N/A               |
| <i>E. coli</i> D3<br>(NDM-1)           | [1]           | N/A               |
| <i>E. coli</i> E1<br>(NDM-1)           | [1]           | N/A               |
| <i>E. coli</i> 2Z49<br>(NDM-5)         | [1]           | N/A               |
| <i>E. coli</i> 2Z69<br>(NDM-5)         | [1]           | N/A               |
| <i>E. coli</i> E4<br>(NDM-5)           | [1]           | N/A               |
| <i>E. coli</i> E2<br>(NDM-9)           | [1]           | N/A               |
| <i>K. pneumoniae</i> QD-KP1<br>(NDM-1) | [1]           | N/A               |
| <i>K. pneumoniae</i> QD-KP2<br>(NDM-1) | [1]           | N/A               |
| <i>K. pneumoniae</i> QD-KP3<br>(NDM-1) | [1]           | N/A               |
| <i>E. cloacae</i> 20710<br>(VIM-1)     | [2]           | N/A               |
| <i>E. cloacae</i> 20712<br>(VIM-1)     | [2]           | N/A               |
| <i>A. baumannii</i> 21                 | This study    | N/A               |

576 **References**

- 577 1. Wang Y, Zhang R, Li J, Wu Z, Yin W, Schwarz S, et al. Comprehensive resistome  
578 analysis reveals the prevalence of NDM and MCR-1 in Chinese poultry production. Nat

579 Microbiol. 2017; 2: 16260.

580 2. Zhou K, Yu X, Zhou Y, Song J, Ji Y, Shen P, et al. Detection of an In104-like  
581 integron carrying a blaIMP-34 gene in *Enterobacter cloacae* isolates co-producing IMP-  
582 34 and VIM-1. J Antimicrob Chemother. 2019; 74: 2812-4.

583

584

585

586

587 **Table S2. Plasmids used in this study.**

| <b>Plasmids</b>               | <b>Source</b> | <b>Identifier</b> |
|-------------------------------|---------------|-------------------|
| pET28a                        | Novagen       | CAT#69864         |
| pETSUMO                       | Invitrogen    | CAT#K300          |
| pET28a-NDM-1                  | This study    | N/A               |
| pETSUMO-KPC-2                 | This study    | N/A               |
| pETSUMO-VIM-1                 | This study    | N/A               |
| pETSUMO-IMP-1                 | This study    | N/A               |
| pETSUMO-OXA-48                | This study    | N/A               |
| pET28a-NDM-3                  | This study    | N/A               |
| pET28a-NDM-9                  | This study    | N/A               |
| pET28a-NDM-1 <sub>I35A</sub>  | This study    | N/A               |
| pET28a-NDM-1 <sub>K211A</sub> | This study    | N/A               |
| pET28a-NDM-1 <sub>H250A</sub> | This study    | N/A               |

588

589

590 **Table S3. Primers used in this study.**

| Primers | Sequences <sup>a, b</sup>                         | Notes                                  |
|---------|---------------------------------------------------|----------------------------------------|
| YG601   | ctg <u>GGATCCT</u> TGAATTCGCCCATATT               | <i>bla</i> <sub>sp-NDM-1</sub> BamHI-F |
| YG602   | ctg <u>GTCGACT</u> CAGCGCAGCTTGTCGGCCAT           | <i>bla</i> <sub>sp-NDM-1</sub> SallI-R |
| YG603   | ctg <u>GGATCC</u> ATGGAATTGCCCAAT                 | <i>bla</i> <sub>NDM-1</sub> BamHI-F    |
| YG604   | ctg <u>GTCGAC</u> GACAAGCTGCGCTGA                 | <i>bla</i> <sub>NDM-1</sub> SallI-R    |
| YG605   | ctg <u>GGATCC</u> ATGACCAACCTCGTCGCG              | <i>bla</i> <sub>KPC-2</sub> BamHI-F    |
| YG606   | ctg <u>GTCGAC</u> GCCCAATCCCTCGAG                 | <i>bla</i> <sub>KPC-2</sub> SallI-R    |
| YG607   | ctg <u>GGATCC</u> ATGTAAAAGTTATTAGTAGT            | <i>bla</i> <sub>VIM-1</sub> BamHI-F    |
| YG608   | ctg <u>CTCGAG</u> CTACTCGGCGACTGAG                | <i>bla</i> <sub>VIM-1</sub> XhoI-R     |
| YG609   | ctg <u>GGATCC</u> ATGAGCAAAGTACTGAGC              | <i>bla</i> <sub>IMP-1</sub> BamHI-F    |
| YG610   | ctg <u>GTCGAC</u> ATGGTTGCTCGGTTTGCT              | <i>bla</i> <sub>IMP-1</sub> SallI-R    |
| YG611   | ctg <u>GGATCCT</u> TGGCAGGAAAACAAA                | <i>bla</i> <sub>OXA-48</sub> BamHI-F   |
| YG612   | ctg <u>GTCGAC</u> CGGAATAATTTTTTC                 | <i>bla</i> <sub>OXA-48</sub> SallI-R   |
| YG613   | CCGCTGGACCAATGACCAGACC                            | <i>bla</i> <sub>NDM-3</sub> BamHI-F    |
| YG614   | GGTCTGGTCATTGGTCCAGGCGG                           | <i>bla</i> <sub>NDM-3</sub> SallI-R    |
| YG615   | CTTGCCCCGCAAAGGGGATGGTTG                          | <i>bla</i> <sub>NDM-9</sub> BamHI-F    |
| YG616   | CAACCATCCCCTTTTGCGGGGCAAG                         | <i>bla</i> <sub>NDM-9</sub> SallI-R    |
| YG617   | GTGAAATCCGCCCGAC <u>GGCT</u> GGCCAGCAAATG<br>GAAA | <i>bla</i> <sub>NDM-1-135A</sub> -F    |
| YG618   | TTTCATTTGCTGGCC <u>AGCC</u> GTCGGGCGGATTT<br>CAC  | <i>bla</i> <sub>NDM-1-135A</sub> -R    |
| YG619   | GGTGGCTGCCTGATC <u>GCGG</u> ACAGCAAGGCCAA         | <i>bla</i> <sub>NDM-1-K211A</sub> -F   |
| YG620   | TTGGCCTTGCTGT <u>CCGCG</u> ATCAGGCAGCCACC         | <i>bla</i> <sub>NDM-1-K211A</sub> -R   |
| YG621   | CATGATCGTGATGAGC <u>CGCT</u> TCCGCCCCGATAG<br>C   | <i>bla</i> <sub>NDM-1-H250A</sub> -F   |
| YG622   | GCTATCGGGGGCGGA <u>AGCG</u> CTCATCACGATCA<br>TG   | <i>bla</i> <sub>NDM-1-H250A</sub> -R   |

591 <sup>a</sup> Restriction enzyme sites are underlined.

592 <sup>b</sup> The mutated codons are underlined in red.

593

594

595

596 **Table S4. IC<sub>50</sub> of the remaining active inhibitors on NDM-1.**

| Number | Drug                      | Structure                                                                            | IC <sub>50</sub> (μg/mL) |
|--------|---------------------------|--------------------------------------------------------------------------------------|--------------------------|
| 1      | Benserazide hydrochloride | 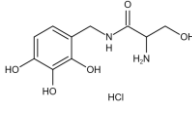   | 2.06                     |
| 2      | Broxyquinoline            |    | 3.00                     |
| 3      | Gadodiamide               |    | 4.61                     |
| 4      | Sertaconazole nitrate     |    | 3.09                     |
| 5      | Dolutegravir Sodium       |    | 9.29                     |
| 6      | 1, 4-Benzoquinone         |   | 3.79                     |
| 7      | Clotrimazole              |  | 2.07                     |
| 8      | Fenticonazole nitrate     |  | 6.30                     |



597 **Table S5. Synergistic antibacterial effect of meropenem in combination with**  
 598 **dexrazoxane on tested strains.**

| Species                               | Antibiotics     | MIC ( $\mu\text{g/mL}$ ) |                     | FIC Index                       |
|---------------------------------------|-----------------|--------------------------|---------------------|---------------------------------|
|                                       |                 | Alone                    | Combination         |                                 |
| <i>E. coli</i> ATCC 25922             | Meropenem       | 0.03 $\pm$ 0.00          | 0.03 $\pm$ 0.00     | 1.06 $\pm$ 0.00                 |
|                                       | Meropenem       | 32.00 $\pm$ 0.00         | 1.00 $\pm$ 0.00     | <b>0.09<math>\pm</math>0.00</b> |
|                                       | Amoxicillin     | 512.00 $\pm$ 0.00        | 512.00 $\pm$ 0.00   | 1.06 $\pm$ 0.00                 |
|                                       | Ciprofloxacin   | 512.00 $\pm$ 0.00        | 341.33 $\pm$ 120.68 | 0.73 $\pm$ 0.24                 |
| <i>E. coli</i> ZJ487 (NDM-1)          | Imipenem        | 13.33 $\pm$ 3.77         | 3.33 $\pm$ 0.94     | <b>0.31<math>\pm</math>0.00</b> |
|                                       | Erythrocin      | 2.00 $\pm$ 0.00          | 2.00 $\pm$ 0.00     | 1.06 $\pm$ 0.00                 |
|                                       | Chloramphenicol | 8.00 $\pm$ 0.00          | 6.67 $\pm$ 1.89     | 0.90 $\pm$ 0.20                 |
|                                       | Tetracycline    | 213.33 $\pm$ 60.34       | 213.33 $\pm$ 60.34  | 13.33 $\pm$ 3.77                |
| <i>E. coli</i> ZC-YN3 (NDM-1)         | Gentamicin      | 341.33 $\pm$ 120.68      | 256.00 $\pm$ 0.00   | 13.33 $\pm$ 3.77                |
|                                       | Meropenem       | 21.33 $\pm$ 7.54         | 2.67 $\pm$ 0.94     | <b>0.19<math>\pm</math>0.00</b> |
| <i>E. coli</i> ZC-YN7 (NDM-9)         | Meropenem       | 13.33 $\pm$ 3.77         | 3.00 $\pm$ 1.41     | <b>0.27<math>\pm</math>0.06</b> |
| <i>E. coli</i> D3 (NDM-1)             | Meropenem       | 13.33 $\pm$ 3.77         | 1.00 $\pm$ 0.00     | <b>0.15<math>\pm</math>0.03</b> |
| <i>E. coli</i> E1 (NDM-1)             | Meropenem       | 13.33 $\pm$ 3.77         | 1.00 $\pm$ 0.00     | <b>0.15<math>\pm</math>0.03</b> |
| <i>E. coli</i> 2Z49 (NDM-5)           | Meropenem       | 32.00 $\pm$ 0.00         | 4.00 $\pm$ 0.00     | <b>0.19<math>\pm</math>0.00</b> |
| <i>E. coli</i> 2Z69 (NDM-5)           | Meropenem       | 32.00 $\pm$ 0.00         | 6.67 $\pm$ 1.89     | <b>0.27<math>\pm</math>0.06</b> |
| <i>E. coli</i> E4 (NDM-5)             | Meropenem       | 53.33 $\pm$ 15.08        | 8.67 $\pm$ 5.73     | <b>0.24<math>\pm</math>0.1</b>  |
| <i>E. coli</i> E2 (NDM-9)             | Meropenem       | 53.33 $\pm$ 15.08        | 4.00 $\pm$ 0.00     | <b>0.15<math>\pm</math>0.03</b> |
| <i>K. pneumoniae</i> QD-KP1 (NDM-1)   | Meropenem       | 64.00 $\pm$ 0.00         | 10.67 $\pm$ 3.77    | <b>0.23<math>\pm</math>0.06</b> |
| <i>K. pneumoniae</i> QD-KP2 (NDM-1)   | Meropenem       | 106.67 $\pm$ 30.17       | 37.33 $\pm$ 19.96   | <b>0.40<math>\pm</math>0.12</b> |
| <i>K. pneumoniae</i> QD-KP3 (NDM-1)   | Meropenem       | 128.00 $\pm$ 0.00        | 12.00 $\pm$ 5.66    | <b>0.10<math>\pm</math>0.02</b> |
| <i>E. coli</i> BL21 (pET28a-SP-NDM-1) | Meropenem       | 128.00 $\pm$ 0.00        | 5.33 $\pm$ 1.89     | <b>0.10<math>\pm</math>0.01</b> |
| <i>E. cloacae</i> 20710 (VIM-1)       | Meropenem       | 32.00 $\pm$ 0.00         | 4.00 $\pm$ 0.00     | <b>0.19<math>\pm</math>0.00</b> |
| <i>E. cloacae</i> 20712 (VIM-1)       | Meropenem       | 32.00 $\pm$ 0.00         | 5.33 $\pm$ 1.89     | <b>0.23<math>\pm</math>0.06</b> |

599 Data are the mean  $\pm$  SD from three independent experiments. Dexrazoxane, 64 $\mu\text{g/mL}$ .

600 **Table S6. Synergistic antibacterial effect of meropenem in combination with**  
 601 **NDGA on tested strains.**

| Species                               | Antibiotics     | MIC ( $\mu\text{g/mL}$ ) |                     | FIC Index                       |
|---------------------------------------|-----------------|--------------------------|---------------------|---------------------------------|
|                                       |                 | Alone                    | Combination         |                                 |
| <i>E. coli</i> ATCC 25922             | Meropenem       | 0.03 $\pm$ 0.00          | 0.03 $\pm$ 0.00     | 1.13 $\pm$ 0.00                 |
|                                       | Meropenem       | 32.00 $\pm$ 0.00         | 1.00 $\pm$ 0.00     | <b>0.16<math>\pm</math>0.00</b> |
|                                       | Amoxicillin     | 512.00 $\pm$ 0.00        | 512.00 $\pm$ 0.00   | 1.13 $\pm$ 0.00                 |
|                                       | Ciprofloxacin   | 512.00 $\pm$ 0.00        | 426.67 $\pm$ 120.68 | 0.96 $\pm$ 0.24                 |
| <i>E. coli</i> ZJ487 (NDM-1)          | Imipenem        | 13.33 $\pm$ 3.77         | 3.33 $\pm$ 0.94     | <b>0.38<math>\pm</math>0.00</b> |
|                                       | Erythrocin      | 2.00 $\pm$ 0.00          | 1.33 $\pm$ 0.47     | 0.79 $\pm$ 0.24                 |
|                                       | Chloramphenicol | 8.00 $\pm$ 0.00          | 5.33 $\pm$ 1.89     | 0.79 $\pm$ 0.24                 |
|                                       | Tetracycline    | 213.33 $\pm$ 60.34       | 213.33 $\pm$ 60.34  | 1.13 $\pm$ 0.00                 |
| <i>E. coli</i> ZC-YN3 (NDM-1)         | Gentamicin      | 341.33 $\pm$ 120.68      | 213.33 $\pm$ 60.34  | 0.79 $\pm$ 0.24                 |
|                                       | Meropenem       | 21.33 $\pm$ 7.54         | 2.67 $\pm$ 0.94     | <b>0.25<math>\pm</math>0.00</b> |
| <i>E. coli</i> ZC-YN7 (NDM-9)         | Meropenem       | 13.33 $\pm$ 3.77         | 1.00 $\pm$ 0.00     | <b>0.21<math>\pm</math>0.03</b> |
| <i>E. coli</i> D3 (NDM-1)             | Meropenem       | 13.33 $\pm$ 3.77         | 2.00 $\pm$ 0.00     | <b>0.29<math>\pm</math>0.06</b> |
| <i>E. coli</i> E1 (NDM-1)             | Meropenem       | 13.33 $\pm$ 3.77         | 2.67 $\pm$ 0.94     | <b>0.33<math>\pm</math>0.03</b> |
| <i>E. coli</i> 2Z49 (NDM-5)           | Meropenem       | 32.00 $\pm$ 0.00         | 8.00 $\pm$ 0.00     | <b>0.38<math>\pm</math>0.00</b> |
| <i>E. coli</i> 2Z69 (NDM-5)           | Meropenem       | 32.00 $\pm$ 0.00         | 6.67 $\pm$ 1.89     | <b>0.33<math>\pm</math>0.06</b> |
| <i>E. coli</i> E4 (NDM-5)             | Meropenem       | 53.33 $\pm$ 15.08        | 2.67 $\pm$ 0.94     | <b>0.19<math>\pm</math>0.10</b> |
| <i>E. coli</i> E2 (NDM-9)             | Meropenem       | 53.33 $\pm$ 15.08        | 24.67 $\pm$ 27.92   | 0.55 $\pm$ 0.41                 |
| <i>K. pneumoniae</i> QD-KP1 (NDM-1)   | Meropenem       | 64.00 $\pm$ 0.00         | 21.33 $\pm$ 7.54    | <b>0.46<math>\pm</math>0.12</b> |
| <i>K. pneumoniae</i> QD-KP2 (NDM-1)   | Meropenem       | 106.67 $\pm$ 30.17       | 69.33 $\pm$ 45.88   | 0.71 $\pm$ 0.31                 |
| <i>K. pneumoniae</i> QD-KP3 (NDM-1)   | Meropenem       | 128.00 $\pm$ 0.00        | 341.33 $\pm$ 120.68 | 0.96 $\pm$ 0.24                 |
| <i>E. coli</i> BL21 (pET28a-SP-NDM-1) | Meropenem       | 128.00 $\pm$ 0.00        | 26.67 $\pm$ 7.54    | <b>0.33<math>\pm</math>0.06</b> |
| <i>E. cloacae</i> 20710 (VIM-1)       | Meropenem       | 32.00 $\pm$ 0.00         | 6.67 $\pm$ 1.89     | <b>0.33<math>\pm</math>0.06</b> |
| <i>E. cloacae</i> 20712 (VIM-1)       | Meropenem       | 32.00 $\pm$ 0.00         | 8.00 $\pm$ 0.00     | <b>0.38<math>\pm</math>0.00</b> |

602 Data are the mean  $\pm$  SD from three independent experiments. NDGA, 32  $\mu\text{g/mL}$ .

603 **Table S7. Synergistic antibacterial effect of meropenem in combination with**  
 604 **embelin on tested strains.**

| Species                               | Antibiotics     | MIC ( $\mu\text{g/mL}$ ) |                     | FIC Index                       |
|---------------------------------------|-----------------|--------------------------|---------------------|---------------------------------|
|                                       |                 | Alone                    | Combination         |                                 |
| <i>E. coli</i> ATCC 25922             | Meropenem       | 0.03 $\pm$ 0.00          | 0.03 $\pm$ 0.00     | 1.25 $\pm$ 0.00                 |
|                                       | Meropenem       | 32.00 $\pm$ 0.00         | 0.03 $\pm$ 0.00     | <b>0.25<math>\pm</math>0.00</b> |
|                                       | Amoxicillin     | 512.00 $\pm$ 0.00        | 512.00 $\pm$ 0.00   | 1.25 $\pm$ 0.00                 |
|                                       | Ciprofloxacin   | 512.00 $\pm$ 0.00        | 426.67 $\pm$ 120.68 | 1.08 $\pm$ 0.24                 |
| <i>E. coli</i> ZJ487 (NDM-1)          | Imipenem        | 13.33 $\pm$ 3.77         | 1.00 $\pm$ 0.00     | <b>0.33<math>\pm</math>0.03</b> |
|                                       | Erythrocin      | 2.00 $\pm$ 0.00          | 1.67 $\pm$ 0.47     | 1.08 $\pm$ 0.24                 |
|                                       | Chloramphenicol | 8.00 $\pm$ 0.00          | 6.67 $\pm$ 1.89     | 1.08 $\pm$ 0.24                 |
|                                       | Tetracycline    | 213.33 $\pm$ 60.34       | 213.33 $\pm$ 60.34  | 1.25 $\pm$ 0.00                 |
|                                       | Gentamicin      | 341.33 $\pm$ 120.68      | 213.33 $\pm$ 60.34  | 0.92 $\pm$ 0.24                 |
| <i>E. coli</i> ZC-YN3 (NDM-1)         | Meropenem       | 21.33 $\pm$ 7.54         | 0.25 $\pm$ 0.00     | <b>0.26<math>\pm</math>0.00</b> |
| <i>E. coli</i> ZC-YN7 (NDM-9)         | Meropenem       | 13.33 $\pm$ 3.77         | 0.50 $\pm$ 0.00     | <b>0.29<math>\pm</math>0.01</b> |
| <i>E. coli</i> D3 (NDM-1)             | Meropenem       | 13.33 $\pm$ 3.77         | 0.50 $\pm$ 0.00     | <b>0.29<math>\pm</math>0.01</b> |
| <i>E. coli</i> E1 (NDM-1)             | Meropenem       | 13.33 $\pm$ 3.77         | 0.50 $\pm$ 0.00     | <b>0.29<math>\pm</math>0.01</b> |
| <i>E. coli</i> 2Z49 (NDM-5)           | Meropenem       | 32.00 $\pm$ 0.00         | 0.33 $\pm$ 0.12     | <b>0.26<math>\pm</math>0.00</b> |
| <i>E. coli</i> 2Z69 (NDM-5)           | Meropenem       | 32.00 $\pm$ 0.00         | 0.50 $\pm$ 0.00     | <b>0.27<math>\pm</math>0.00</b> |
| <i>E. coli</i> E4 (NDM-5)             | Meropenem       | 53.33 $\pm$ 15.08        | 0.50 $\pm$ 0.00     | <b>0.26<math>\pm</math>0.00</b> |
| <i>E. coli</i> E2 (NDM-9)             | Meropenem       | 53.33 $\pm$ 15.08        | 0.50 $\pm$ 0.00     | <b>0.26<math>\pm</math>0.00</b> |
| <i>K. pneumoniae</i> QD-KP1 (NDM-1)   | Meropenem       | 64.00 $\pm$ 0.00         | 1.67 $\pm$ 0.47     | <b>0.28<math>\pm</math>0.01</b> |
| <i>K. pneumoniae</i> QD-KP2 (NDM-1)   | Meropenem       | 106.67 $\pm$ 30.17       | 1.33 $\pm$ 0.47     | <b>0.27<math>\pm</math>0.01</b> |
| <i>K. pneumoniae</i> QD-KP3 (NDM-1)   | Meropenem       | 128.00 $\pm$ 0.00        | 1.67 $\pm$ 0.47     | <b>0.28<math>\pm</math>0.01</b> |
| <i>E. coli</i> BL21 (pET28a-SP-NDM-1) | Meropenem       | 128.00 $\pm$ 0.00        | 0.50 $\pm$ 0.00     | <b>0.25<math>\pm</math>0.00</b> |
| <i>E. cloacae</i> 20710 (VIM-1)       | Meropenem       | 32.00 $\pm$ 0.00         | 4.00 $\pm$ 0.00     | <b>0.26<math>\pm</math>0.00</b> |
| <i>E. cloacae</i> 20712 (VIM-1)       | Meropenem       | 32.00 $\pm$ 0.00         | 0.25 $\pm$ 0.00     | <b>0.26<math>\pm</math>0.00</b> |

605 Data are the mean  $\pm$  SD from three independent experiments. Embelin, 32  $\mu\text{g/mL}$ .

606 **Table S8. Synergistic antibacterial effect of meropenem in combination with CAN**  
 607 **on tested strains.**

| Species                               | Antibiotics     | MIC ( $\mu\text{g/mL}$ ) |                     | FIC Index                       |
|---------------------------------------|-----------------|--------------------------|---------------------|---------------------------------|
|                                       |                 | Alone                    | Combination         |                                 |
| <i>E. coli</i> ATCC 25922             | Meropenem       | 0.03 $\pm$ 0.00          | 0.03 $\pm$ 0.00     | 1.06 $\pm$ 0.00                 |
|                                       | Meropenem       | 32.00 $\pm$ 0.00         | 2.00 $\pm$ 0.00     | <b>0.13<math>\pm</math>0.00</b> |
|                                       | Amoxicillin     | 512.00 $\pm$ 0.00        | 512.00 $\pm$ 0.00   | 1.06 $\pm$ 0.00                 |
|                                       | Ciprofloxacin   | 512.00 $\pm$ 0.00        | 512.00 $\pm$ 0.00   | 1.06 $\pm$ 0.00                 |
| <i>E. coli</i> ZJ487 (NDM-1)          | Imipenem        | 13.33 $\pm$ 3.77         | 1.33 $\pm$ 0.47     | <b>0.17<math>\pm</math>0.03</b> |
|                                       | Erythrocin      | 2.00 $\pm$ 0.00          | 1.67 $\pm$ 0.47     | 0.90 $\pm$ 0.24                 |
|                                       | Chloramphenicol | 8.00 $\pm$ 0.00          | 8.00 $\pm$ 0.00     | 1.06 $\pm$ 0.00                 |
|                                       | Tetracycline    | 213.33 $\pm$ 60.34       | 170.67 $\pm$ 60.34  | 0.90 $\pm$ 0.24                 |
|                                       | Gentamicin      | 341.33 $\pm$ 120.68      | 341.33 $\pm$ 120.68 | 1.06 $\pm$ 0.00                 |
| <i>E. coli</i> ZC-YN3 (NDM-1)         | Meropenem       | 21.33 $\pm$ 7.54         | 3.33 $\pm$ 0.94     | <b>0.23<math>\pm</math>0.06</b> |
| <i>E. coli</i> ZC-YN7 (NDM-9)         | Meropenem       | 13.33 $\pm$ 3.77         | 3.33 $\pm$ 0.94     | <b>0.31<math>\pm</math>0.00</b> |
| <i>E. coli</i> D3 (NDM-1)             | Meropenem       | 13.33 $\pm$ 3.77         | 1.67 $\pm$ 0.47     | <b>0.19<math>\pm</math>0.00</b> |
| <i>E. coli</i> E1 (NDM-1)             | Meropenem       | 13.33 $\pm$ 3.77         | 2.33 $\pm$ 1.25     | <b>0.23<math>\pm</math>0.06</b> |
| <i>E. coli</i> 2ZA9 (NDM-5)           | Meropenem       | 32.00 $\pm$ 0.00         | 6.67 $\pm$ 1.89     | <b>0.27<math>\pm</math>0.06</b> |
| <i>E. coli</i> 2Z69 (NDM-5)           | Meropenem       | 32.00 $\pm$ 0.00         | 5.33 $\pm$ 1.89     | <b>0.23<math>\pm</math>0.06</b> |
| <i>E. coli</i> E4 (NDM-5)             | Meropenem       | 53.33 $\pm$ 15.08        | 10.67 $\pm$ 3.77    | <b>0.27<math>\pm</math>0.06</b> |
| <i>E. coli</i> E2 (NDM-9)             | Meropenem       | 53.33 $\pm$ 15.08        | 13.33 $\pm$ 13.20   | <b>0.29<math>\pm</math>0.19</b> |
| <i>K. pneumoniae</i> QD-KP1 (NDM-1)   | Meropenem       | 64.00 $\pm$ 0.00         | 16.00 $\pm$ 0.00    | <b>0.31<math>\pm</math>0.00</b> |
| <i>K. pneumoniae</i> QD-KP2 (NDM-1)   | Meropenem       | 106.67 $\pm$ 30.17       | 8.00 $\pm$ 0.00     | <b>0.15<math>\pm</math>0.03</b> |
| <i>K. pneumoniae</i> QD-KP3 (NDM-1)   | Meropenem       | 128.00 $\pm$ 0.00        | 256.00 $\pm$ 0.00   | 0.73 $\pm$ 0.24                 |
| <i>E. coli</i> BL21 (pET28a-SP-NDM-1) | Meropenem       | 128.00 $\pm$ 0.00        | 21.33 $\pm$ 7.54    | <b>0.23<math>\pm</math>0.06</b> |
| <i>E. cloacae</i> 20710 (VIM-1)       | Meropenem       | 32.00 $\pm$ 0.00         | 10.67 $\pm$ 3.77    | <b>0.40<math>\pm</math>0.12</b> |
| <i>E. cloacae</i> 20712 (VIM-1)       | Meropenem       | 32.00 $\pm$ 0.00         | 6.67 $\pm$ 1.89     | <b>0.27<math>\pm</math>0.06</b> |

608 Data are the mean  $\pm$  SD from three independent experiments. CAN, 64  $\mu\text{g/mL}$ .

609 **Figures**

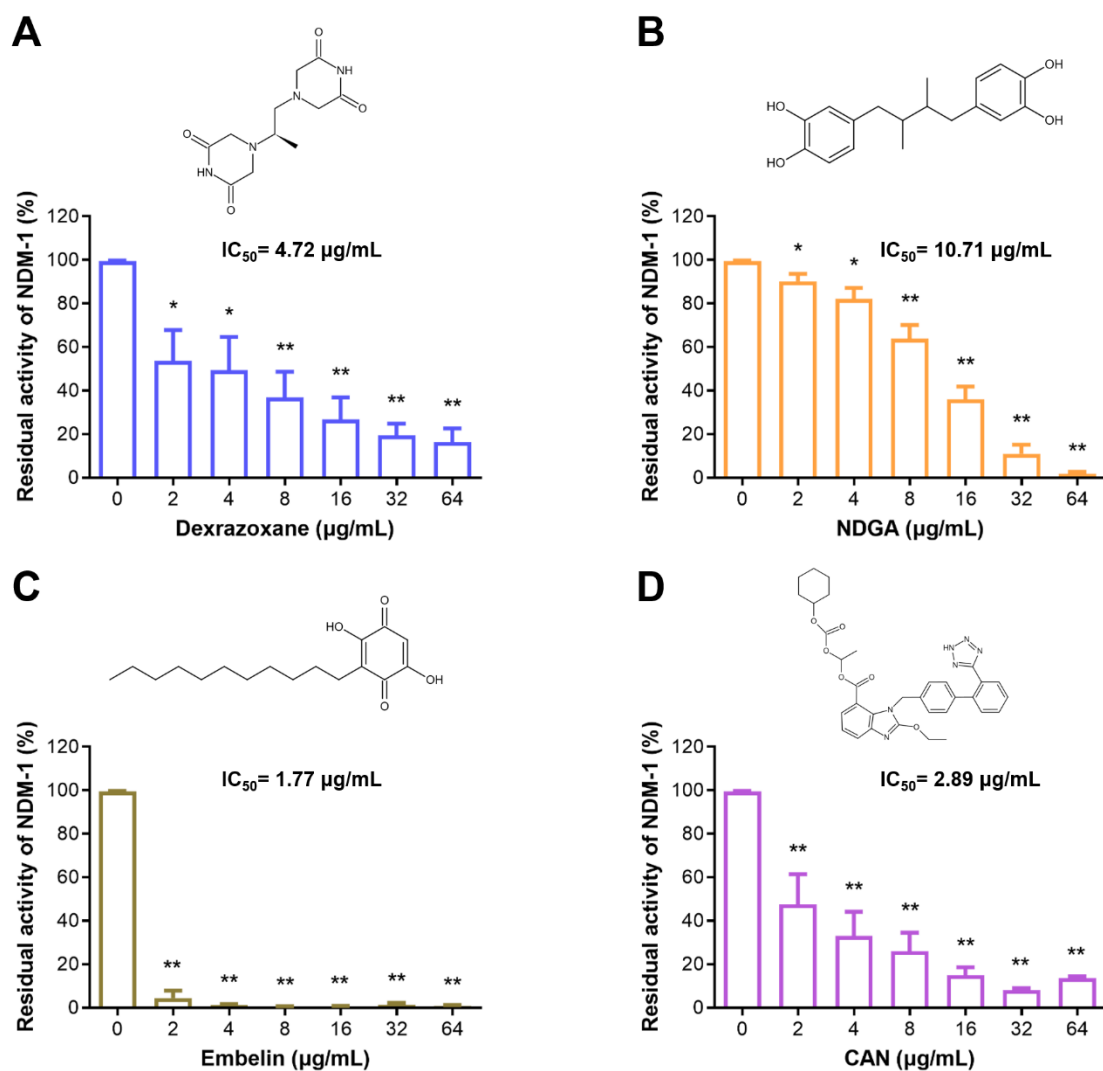

610

611 **Figure 1. Four inhibitors were screened for their ability to inactivate NDM-1.**

612 Inhibition of NDM-1 by dexrazoxane (A), NDGA (B), embelin (C) and CAN (D). The

613 chemical structures of the inhibitors are shown in each panel. The positive control was

614 performed in the presence of NDM-1 without inhibitors, while the negative control was

615 carried out in the absence of enzyme. Percent residual activity of NDM-1

616 =  $\frac{A - A_0}{A_{100} - A_0} \times 100\%$ , where A represents the absorbance of samples at 492 nm,

617 A<sub>0</sub> and A<sub>100</sub> represent 0% and 100% activity of enzyme as determined in the negative

618 control and positive control, respectively. All the data represent the mean ± SD from

619 three independent experiments. \* indicates  $P < 0.05$  and \*\* indicates  $P < 0.01$  by

620 Student's  $t$ -test.

621

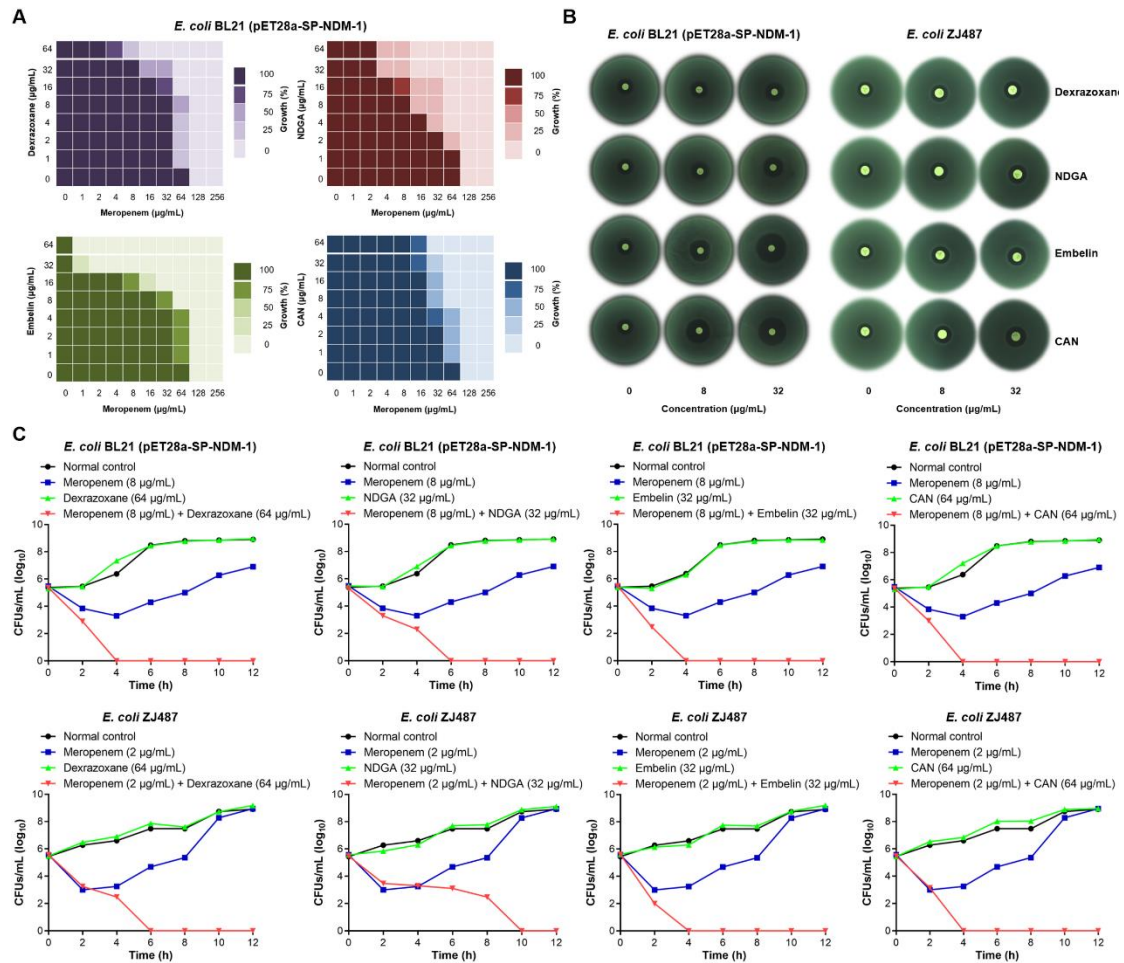

622

623 **Figure 2. Dexrazoxane, NDGA, embelin and CAN rescue the antibacterial activity**  
 624 **of meropenem *in vitro*.**

625 (A) Microdilution checkerboard analysis showed the synergistic antibacterial effect of  
 626 dexrazoxane, NDGA, embelin and CAN and meropenem against *E. coli* BL21  
 627 (pET28a-SP-NDM-1). (B) Zones of inhibition surrounding meropenem disks  
 628 supplemented with increasing concentrations of dexrazoxane, NDGA, embelin and  
 629 CAN for the NDM-1-positive strains. (C) Time-dependent killing by the combination  
 630 of meropenem and dexrazoxane, NDGA, embelin or CAN against ZJ487 and *E. coli*  
 631 BL21 (pET28a-SP-NDM-1). The data shown in panels A, B and C are one  
 632 representative of three independent experiments.

633

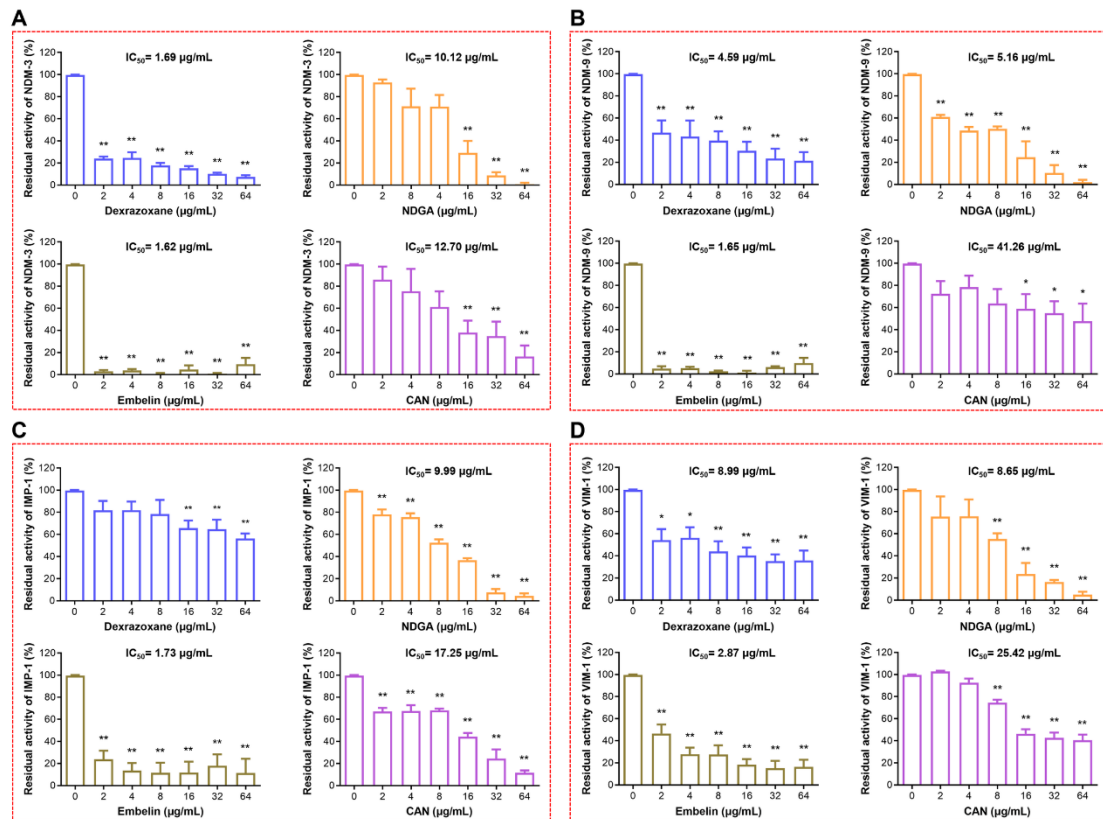

634

635 **Figure 3. Dexrazoxane, NDGA, embelin and CAN suppress the activity of NDM-**  
 636 **3, NDM-9, IMP-1 and VIM-1.**

637 Following pre-incubation of dexrazoxane, NDGA, embelin and CAN with NDM-3 (A),  
 638 NDM-9 (B), IMP-1 (C) and VIM-1 (D), the residual enzymatic activity of these  
 639 proteins was determined as shown in Figure 1. The data shown are the mean  $\pm$  SD from  
 640 three independent experiments. \* indicates  $P < 0.05$  and \*\* indicates  $P < 0.01$  by  
 641 Student's  $t$ -test.

642



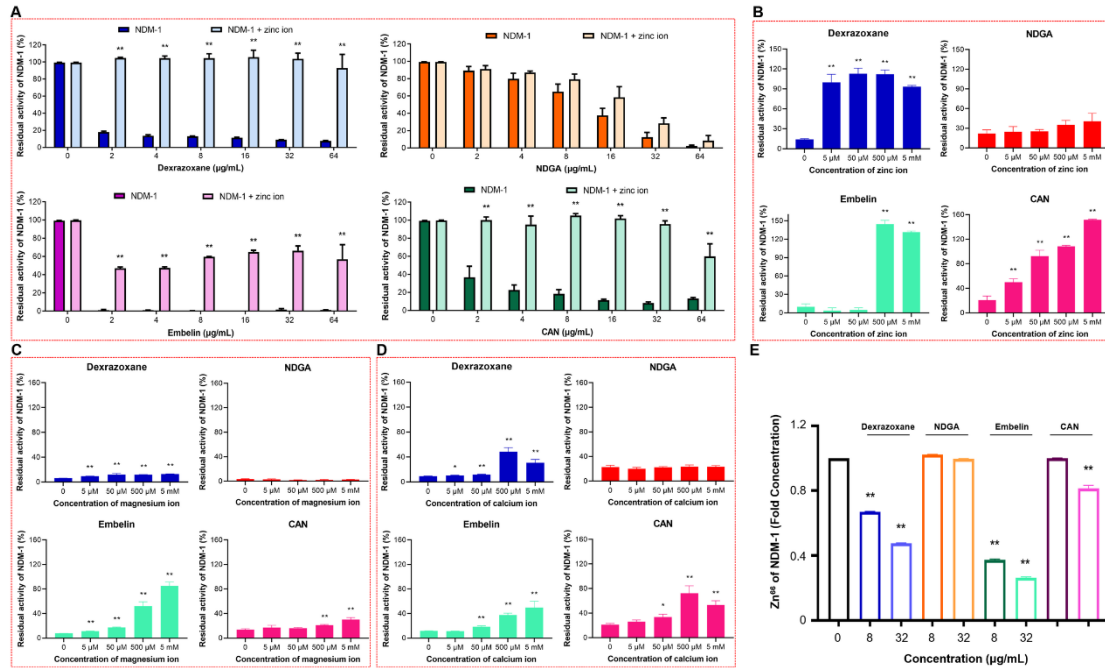

643

644 **Figure 4. Dextrazoxane, embelin and CAN act as metal ion chelators to inhibit**  
 645 **NDM-1 activity.**

646 (A) Residual activity of NDM-1 after the addition of 500 µM zinc ions in the presence  
 647 of increasing concentrations of dextrazoxane, NDGA, embelin and CAN. (B-D)  
 648 Supplementation with increasing concentrations of zinc ions (B), magnesium ions (C)  
 649 and calcium ions (D) relieved the inhibition of NDM-1 mediated by dextrazoxane,  
 650 embelin and CAN. (E) Zinc ion depletion by dextrazoxane, embelin and CAN as  
 651 determined by ICP-MS. The vertical coordinate represents the fold concentration of  
 652 free Zn<sup>66</sup> in NDM-1. The data shown are the mean ± SD from three independent  
 653 experiments. \* indicates  $P < 0.05$  and \*\* indicates  $P < 0.01$  by Student's  $t$ -test.

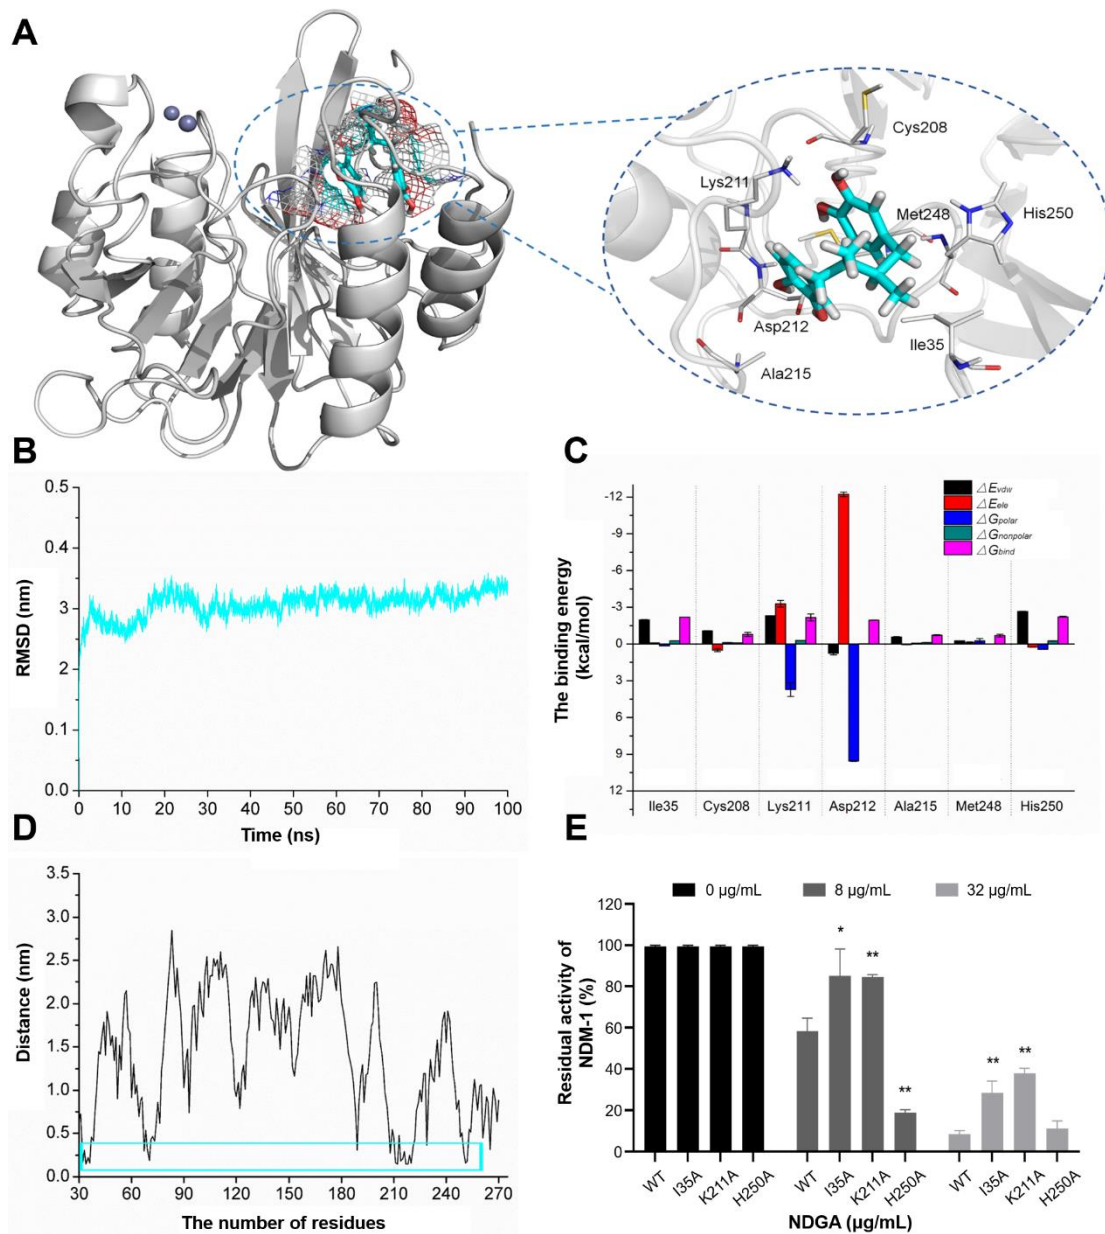

654

655 **Figure 5. Direct engagement of NDGA with NDM-1.**

656 (A) The three-dimensional structure determination of NDM-1 with the NDGA complex

657 via a molecular modelling method. The purple spheres represent zinc ions. (B) The

658 RMSD values of the NDM-1-NDGA complex. (C) Decomposition of the binding

659 energy on a per-residue basis in the binding sites of the NDM-1-NDGA complex. (D)

660 Analysis of the distance between all residues of NDM-1 and NDGA. (E) Residual

661 activity of NDM-1 and its mutants in the presence of different concentrations of NDGA.

662 Data shown in panel E are the mean  $\pm$  SD. \* indicates  $P < 0.05$  and \*\* indicates  $P <$

663 0.01 by Student's  $t$ -test.

664

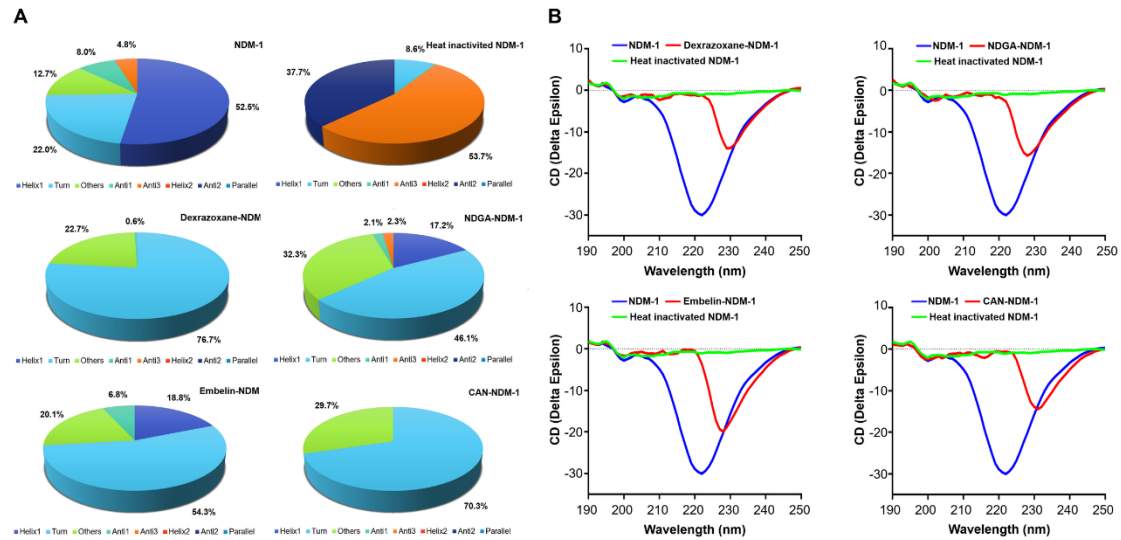

665

666 **Figure 6. Inhibitors alter the secondary structure of NDM-1.**

667 (A) Secondary structure composition of NDM-1 in the presence or absence of 32  $\mu\text{g/mL}$

668 of the inhibitors as determined by CD spectra. (B) Calculated CD spectrum with

669 dexrazoxane, NDGA, embelin and CAN on NDM-1. Comparison between NDM-1

670 (blue), NDM-1 treated with inhibitor (red) and heat inactivated NDM-1 (green) at 70  $^{\circ}\text{C}$

671 for 30 min. The wavelength for CD spectroscopy was set as 190-250 nm.

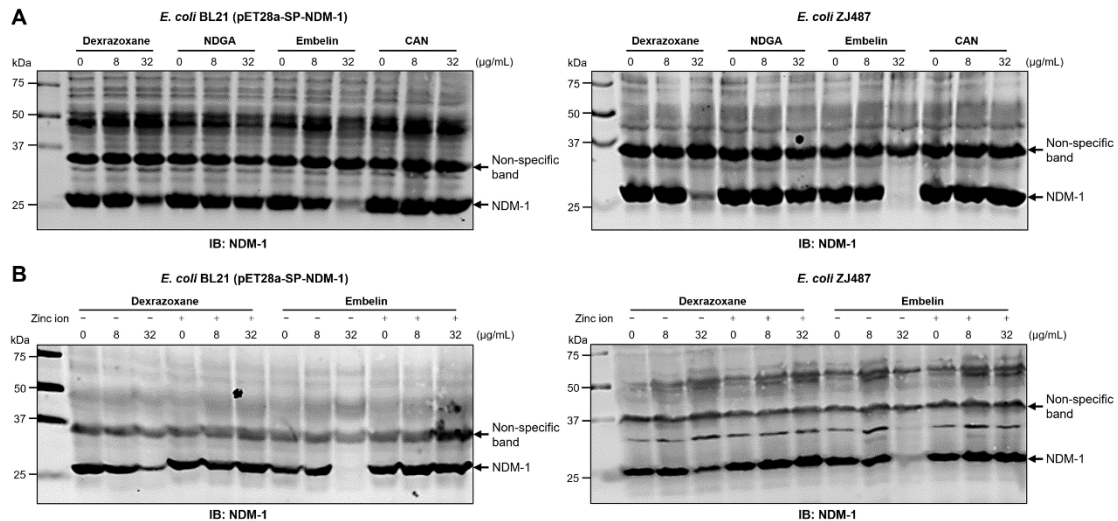

672

673 **Figure 7. Dexrazoxane and embelin induce NDM-1 degradation via metal ion**

674 **depletion manner.**

675 (A) NDM-1 levels in *E. coli* strains BL21 (pET28a-SP-NDM-1) and ZJ487 treated with

676 the indicated concentrations of inhibitors. (B) The addition of 500  $\mu\text{M}$  of zinc ions

677 suppresses the degradation of NDM-1 resulting from dexrazoxane and embelin

678 treatment. Total proteins of bacteria cultured in the presence or absence of inhibitors

679 and additional zinc ions were separated by SDS-PAGE and probed with NDM-1

680 specific antibody. The non-specific band was used as an internal loading control. The

681 blots shown are one representative of three independent experiments with similar

682 observations.

683

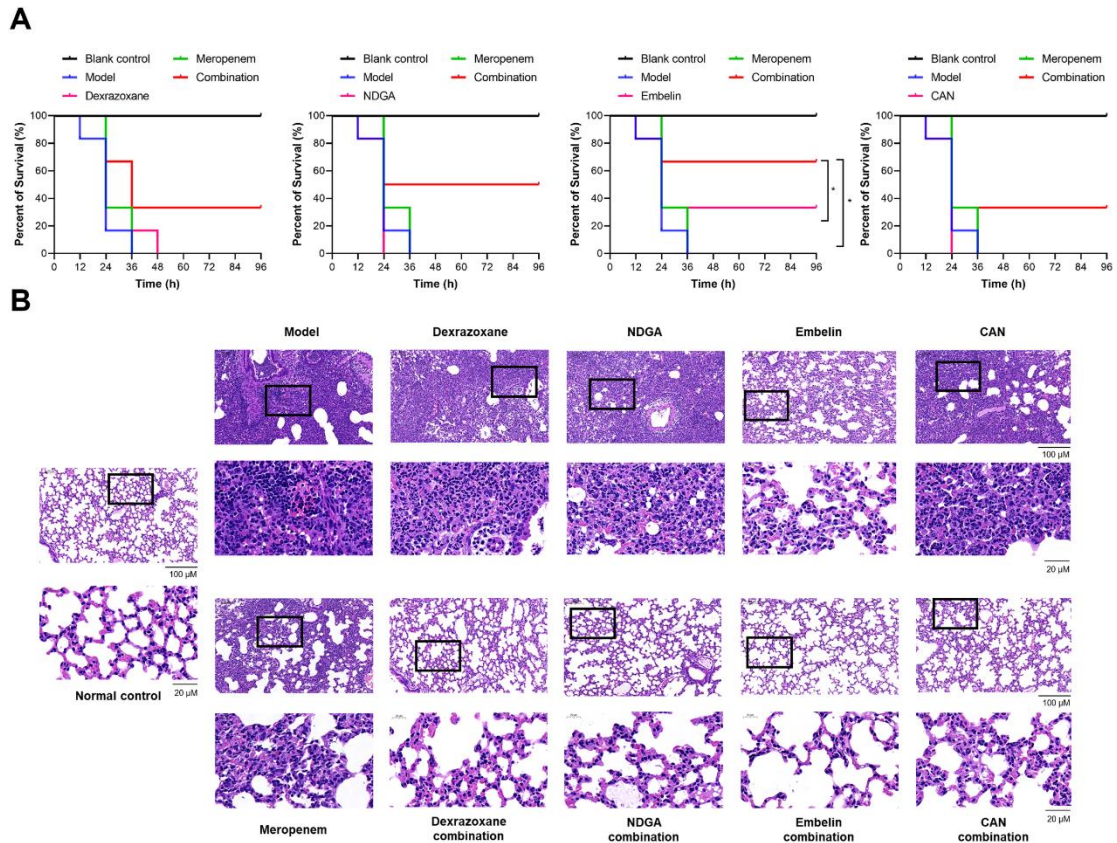

684

685 **Figure 8. Dexrazoxane, NDGA, embelin and CAN rescue meropenem efficacy *in***

686 ***vivo*.**

687 Mice were challenged with *E. coli* ZJ487 and then treated with inhibitors (80 mg/kg),

688 meropenem (10 mg/kg), inhibitors (80 mg/kg) combined with meropenem (10 mg/kg)

689 (combination), or DMSO (model). Mice without bacterial infection were included as a

690 blank control. (A) The combination of individual inhibitors and meropenem

691 significantly increased the survival rate of mice intraperitoneally infected with *E. coli*

692 ZJ487 compared with meropenem monotherapy. Mice were randomly allocated into

693 different groups and each group contained 6 mice (n=6). (B) The combination of

694 individual inhibitors and meropenem alleviated histopathological injury of mice in a

695 mouse pneumonia model compared with meropenem monotherapy. Lungs of infected

696 mice were collected 72 h post-infection and stained with haematoxylin and eosin.

697 Histopathological changes were visualized under a digital slide scanner. Mice were  
698 randomly allocated into different groups and each group contained 6 mice (n=6). The  
699 experimental results shown in panels A and B are one representative from three  
700 independent experiments. \* indicates  $P < 0.05$  as determined by log-rank (Mantel-Cox)  
701 test.  
702

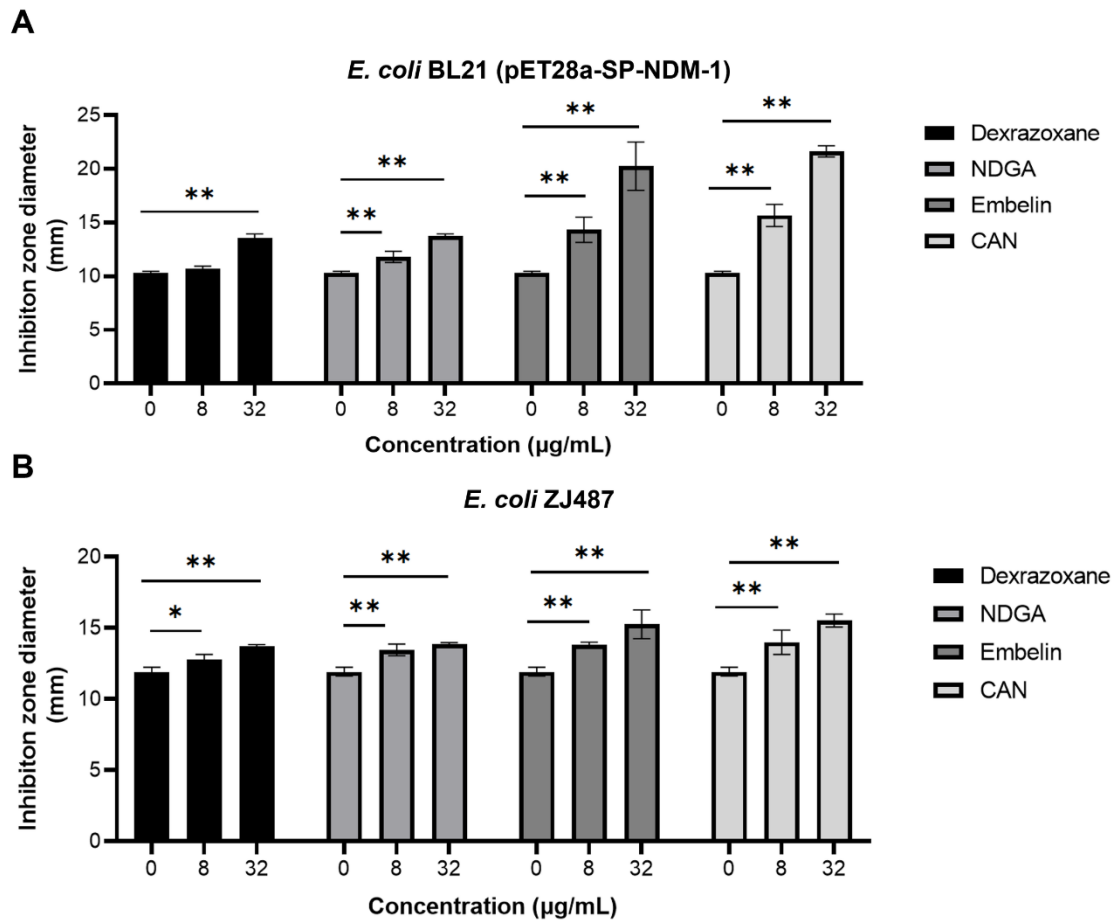

703

704 **Figure 2- figure supplement 1. Dexrazoxane, NDGA, embelin and CAN rescued**  
705 **the activity of meropenem *in vitro* (related to Figure 2B).**

706 The inhibition zone diameter of meropenem disks supplemented with 0  $\mu\text{g/mL}$ , 8  
707  $\mu\text{g/mL}$  or 32  $\mu\text{g/mL}$  of dexrazoxane, NDGA, embelin and CAN against *E. coli* strains

708 BL21 (pET28a-SP-NDM-1) (A) and ZJ487 (B). The data shown are the mean  $\pm$  SD

709 from three independent experiments. \* indicates  $P < 0.05$  and \*\* indicates  $P < 0.01$  by

710 Student's *t*-test.

711

712



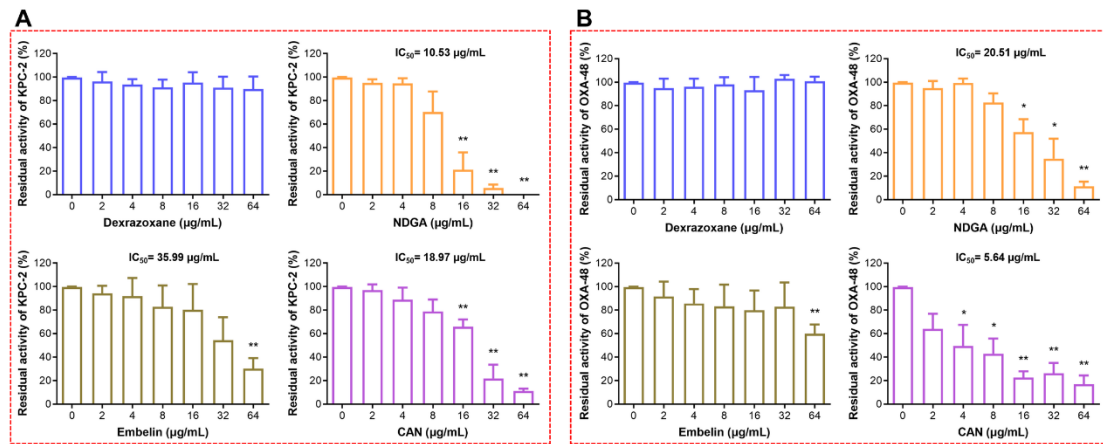

713

714 **Figure 3- figure supplement 1. Effects of dexrazoxane, NDGA, embelin and CAN**  
715 **on the activity of KPC-2 and OXA-48.**

716 Inhibition of KPC-2 (**A**) and OXA-48 (**B**) by dexrazoxane, NDGA, embelin and CAN.

717 Data represent the mean  $\pm$  SD from three independent experiments. \* indicates  $P < 0.05$

718 and \*\* indicates  $P < 0.01$  by Student's  $t$ -test.

719

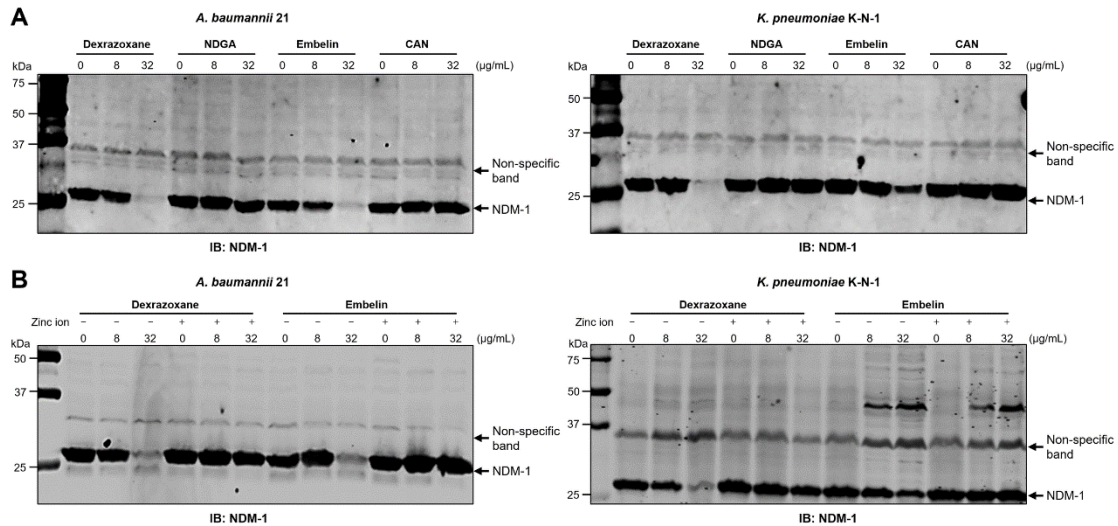

720

721 **Figure 7- figure supplement 1. Dexrazoxane and embelin induce NDM-1**  
722 **degradation via metal ion depletion manner.**

723 (A) NDM-1 levels in *A. baumannii* 21 and *K. pneumoniae* K-N-1 treated with the  
724 indicated concentrations of inhibitors. (B) The addition of 500  $\mu\text{M}$  of zinc ions  
725 suppresses the degradation of NDM-1 resulting from dexrazoxane and embelin  
726 treatment. Total proteins of bacteria cultured in the presence or absence of inhibitors  
727 and additional zinc ions were separated by SDS-PAGE and probed with NDM-1  
728 specific antibody. The non-specific band was used as an internal loading control. The  
729 blots shown are one representative of three independent experiments with similar  
730 observations.

731

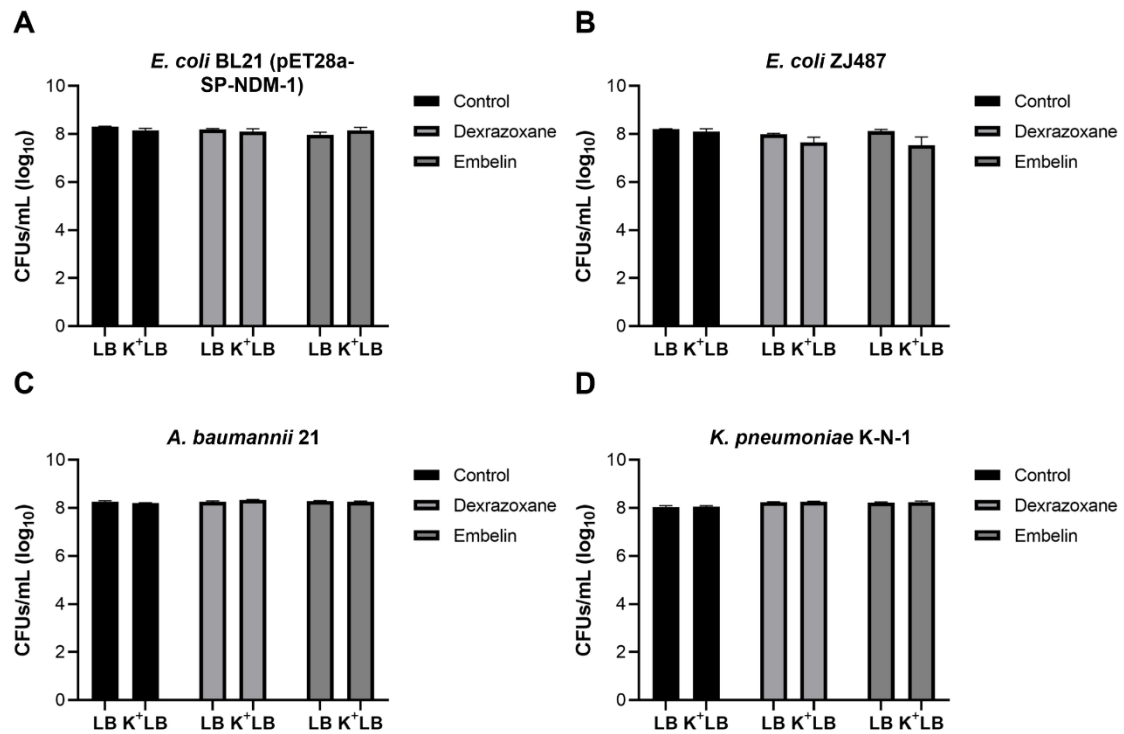

732

733 **Figure 7- figure supplement 2. Dexrazoxane and embelin do not affect plasmid**  
734 **stability.**

735 Plasmid stability of *E. coli* BL21 (pET28a-SP-NDM-1) (A), *E. coli* ZJ487 (B), *A.*  
736 *baumannii* 21 (C) or *K. pneumoniae* K-N-1 (D) following culture with 32  $\mu$ g/mL of  
737 dexrazoxane or embelin. The data shown are the mean  $\pm$  SD from three independent  
738 experiments.

739

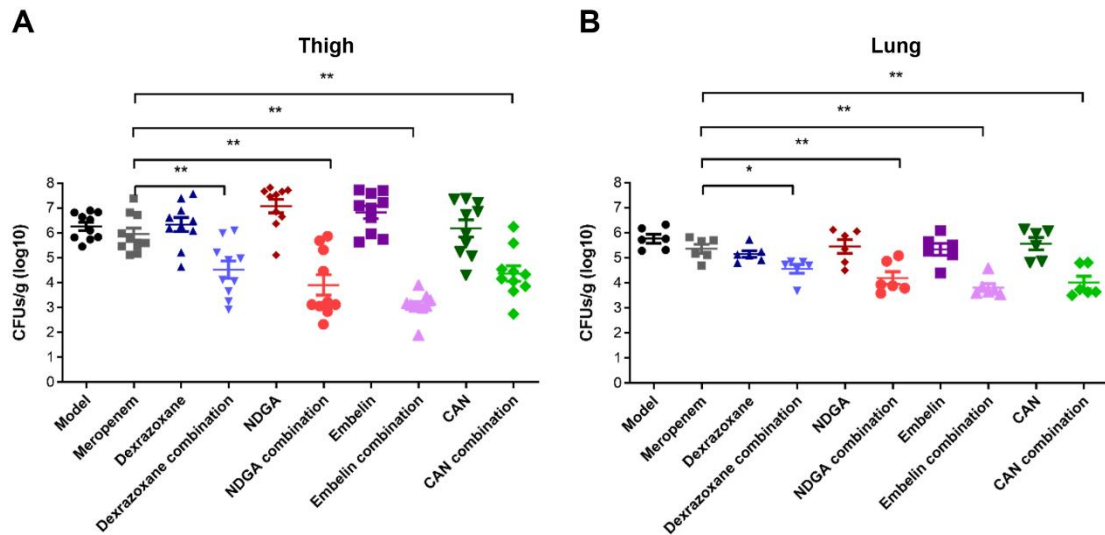

740

741 **Figure 8- figure supplement 1. Dexrazoxane, NDGA, embelin and CAN rescue**  
742 **meropenem activity *in vivo*.**

743 (A) The combination of meropenem with dexrazoxane, NDGA, embelin or CAN  
744 decreased the bacterial load in the mouse thigh infection model compared with the  
745 meropenem monotherapy. Mice were randomly allocated into different groups and each  
746 group contains 10 mice (n=10). (B) The combination of meropenem with dexrazoxane,  
747 NDGA, embelin or CAN reduced the bacterial load of the lungs in the mouse  
748 pneumonia model compared with the meropenem monotherapy (related to Figure 8B).  
749 Mice were randomly allocated into different groups and each group contains 6 mice  
750 (n=6). The data shown are one representative of three independent experiments. \*  
751 indicates  $P < 0.05$  and \*\* indicates  $P < 0.01$  by Mann–Whitney U test.

**A**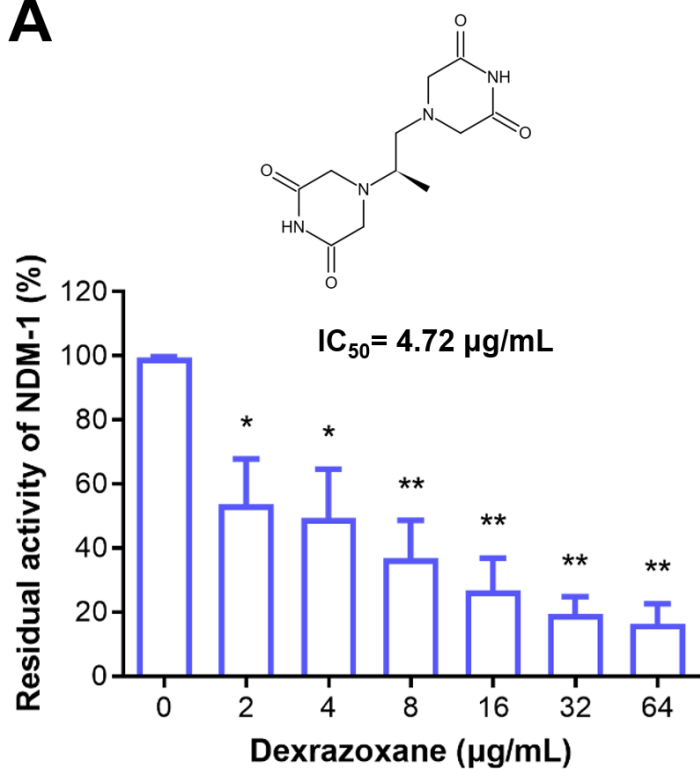**B**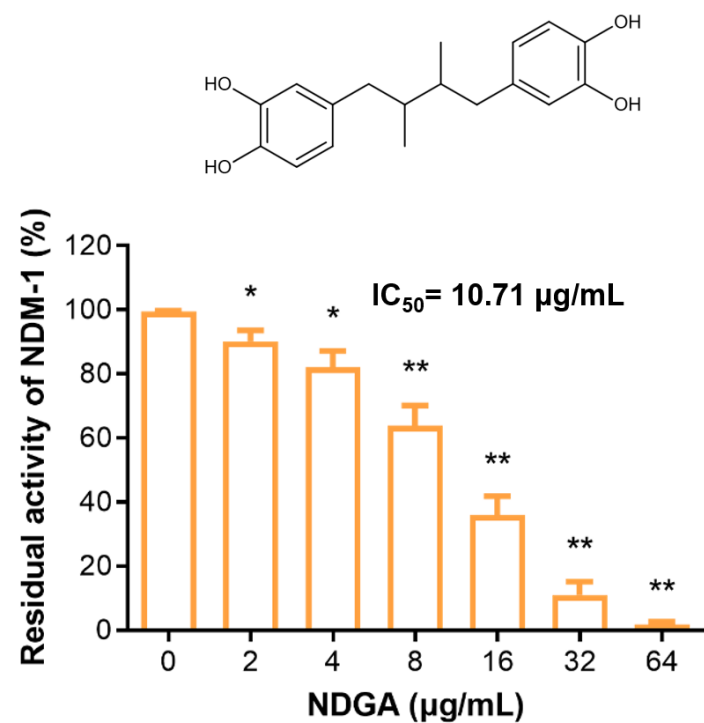**C**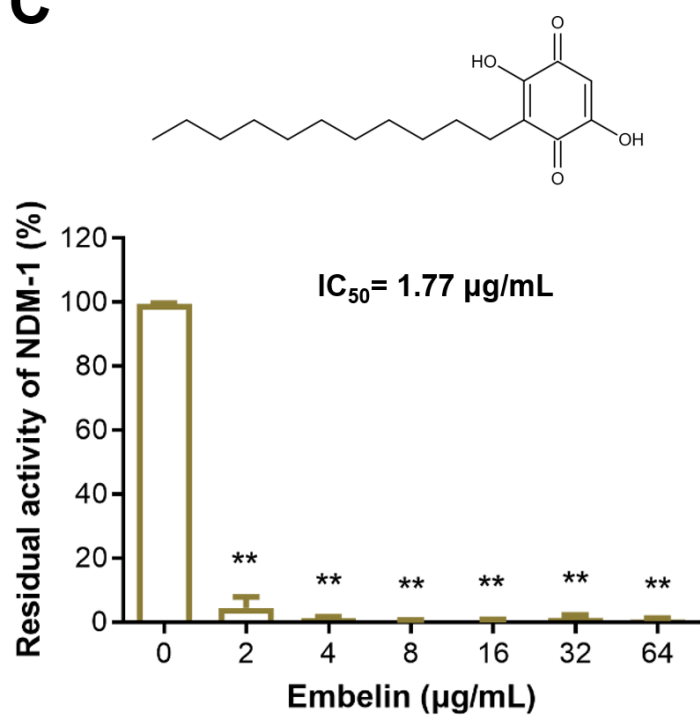**D**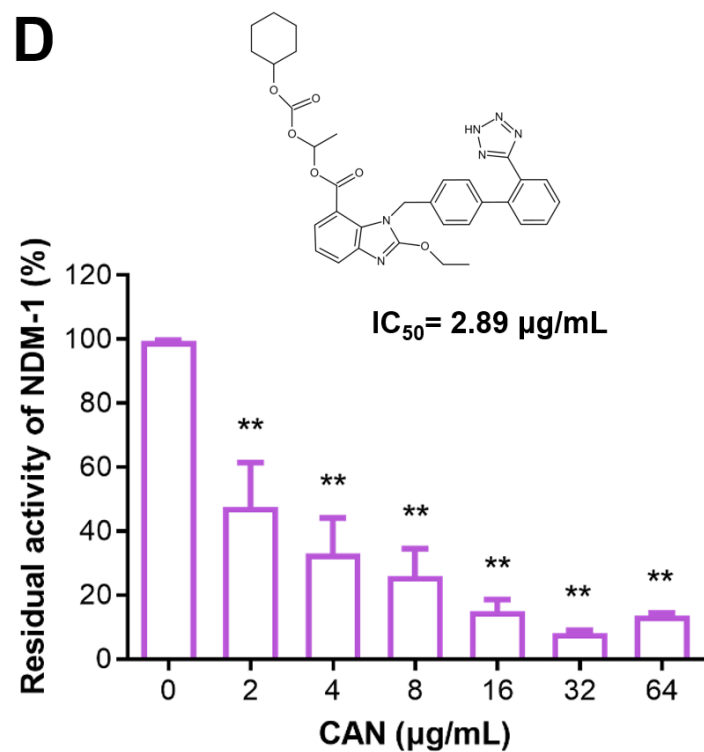

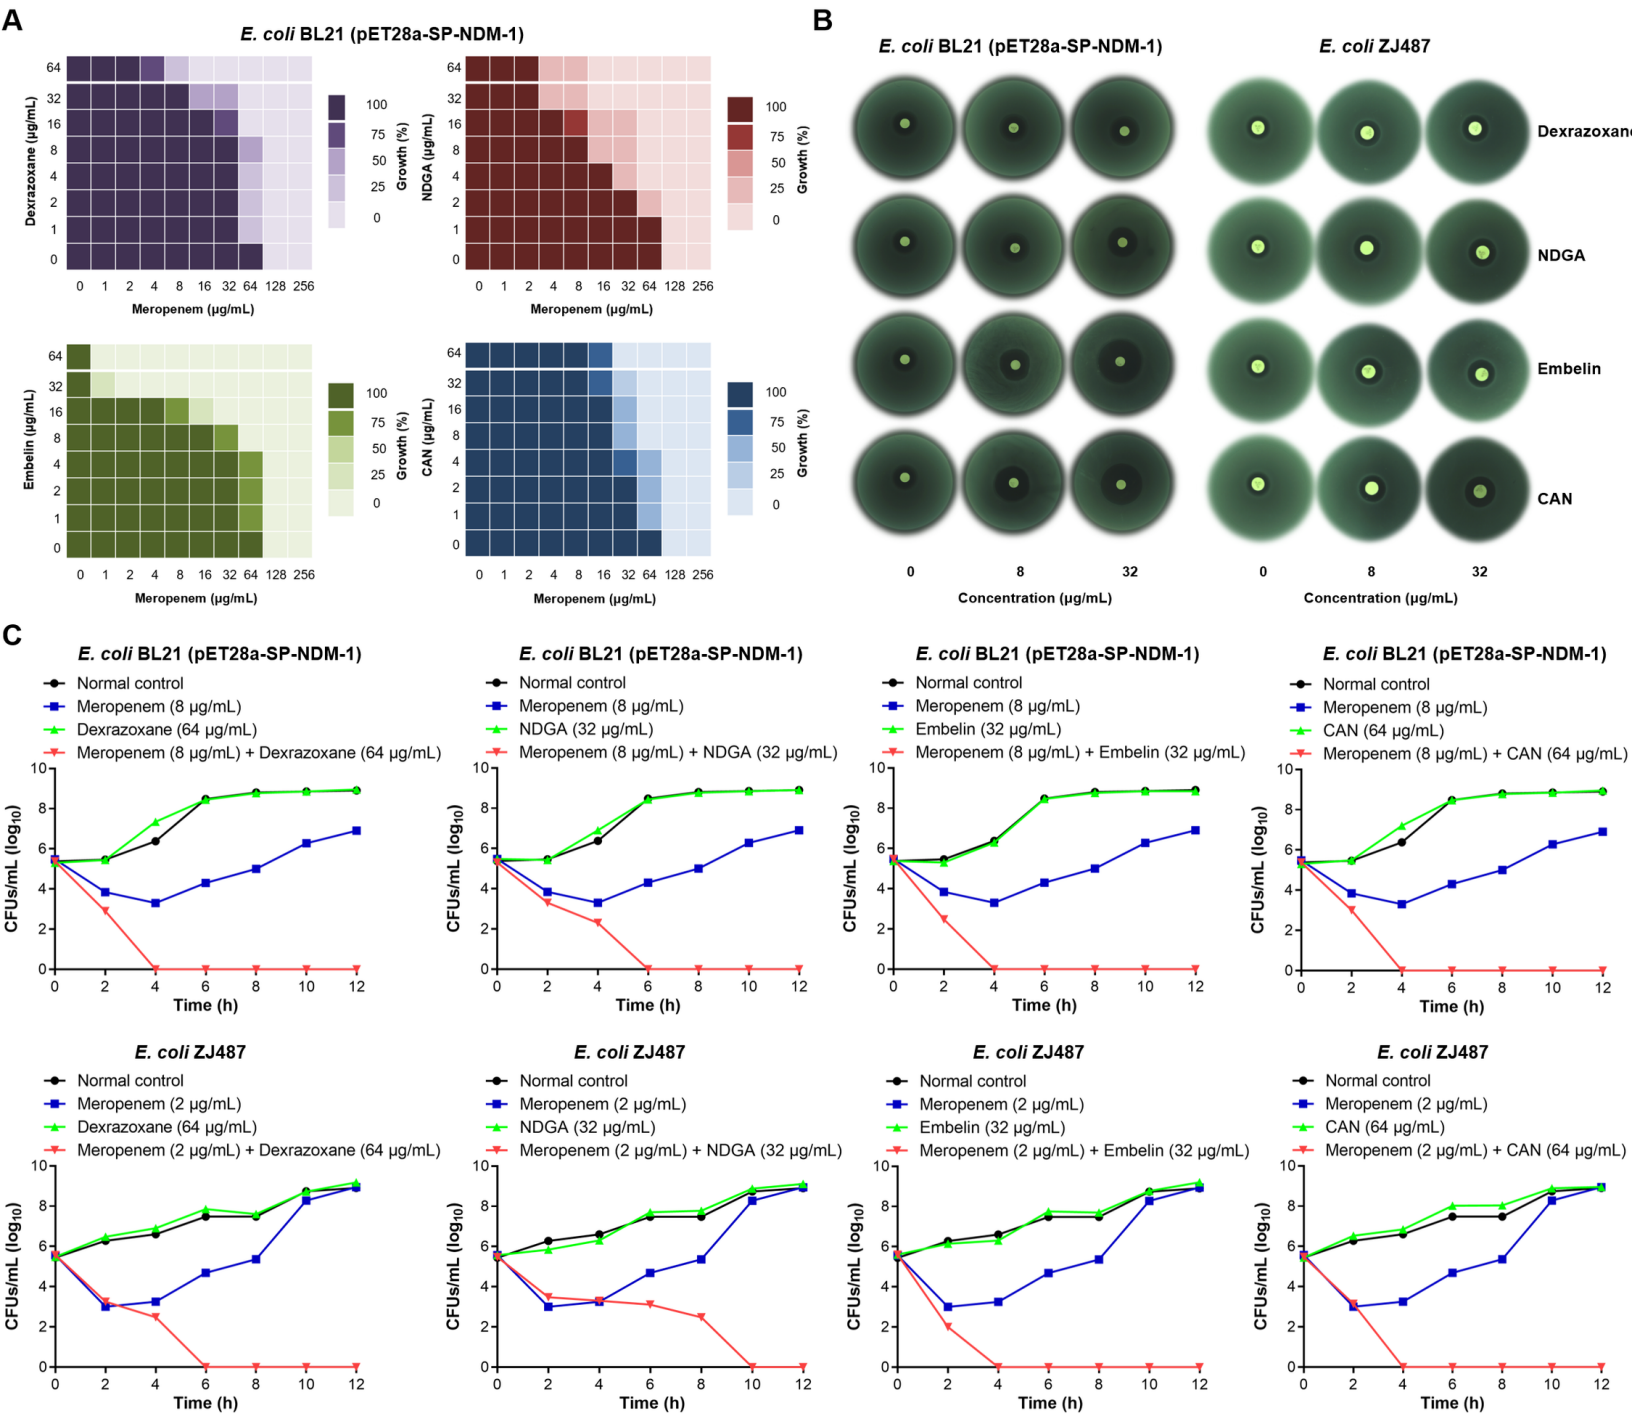

**A**

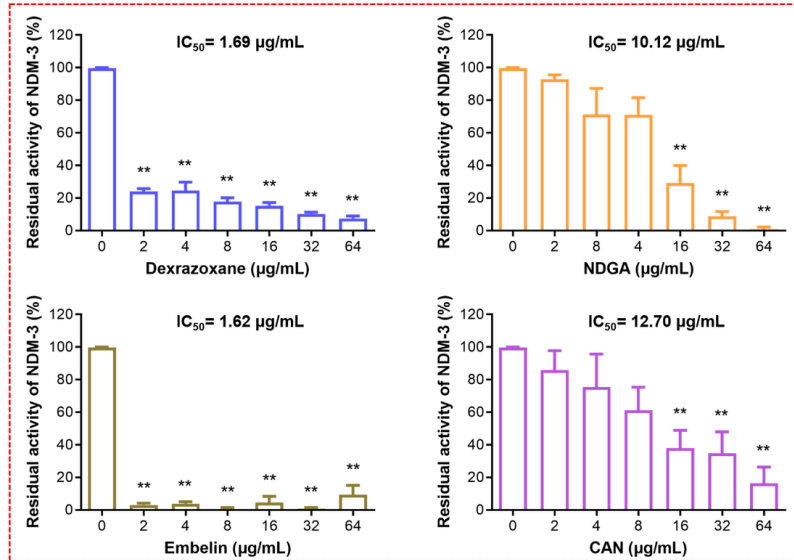

**B**

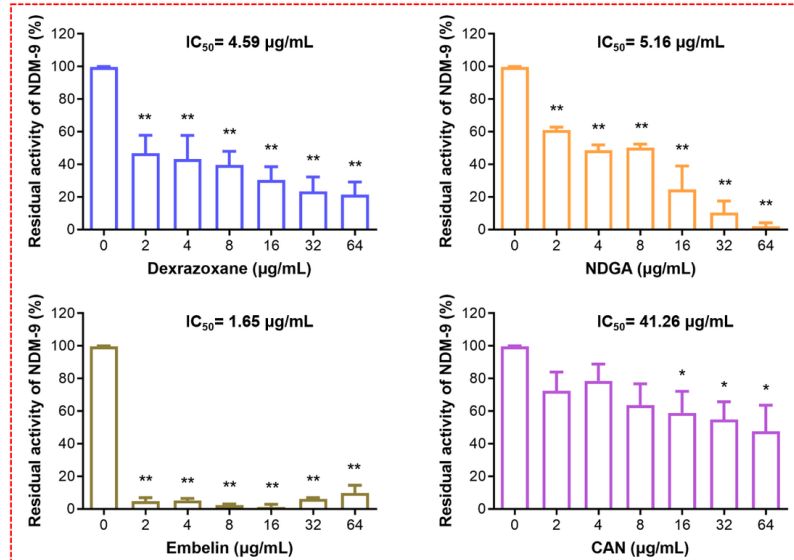

**C**

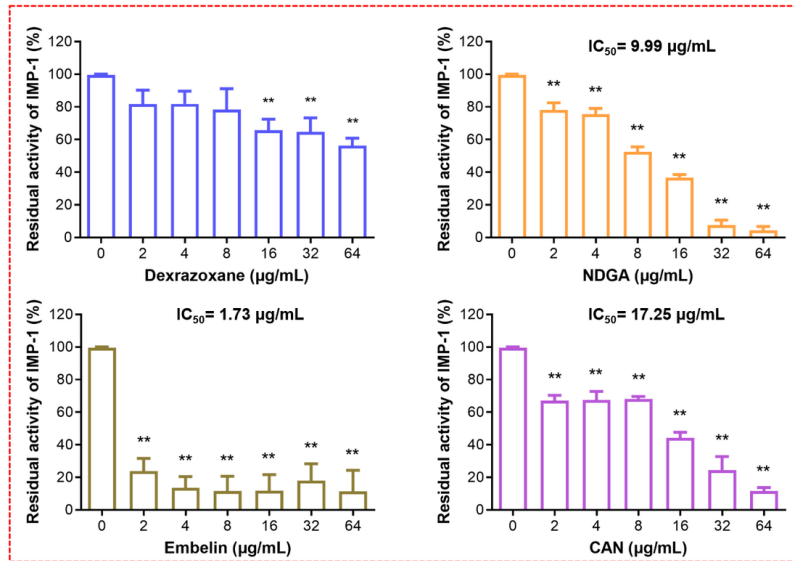

**D**

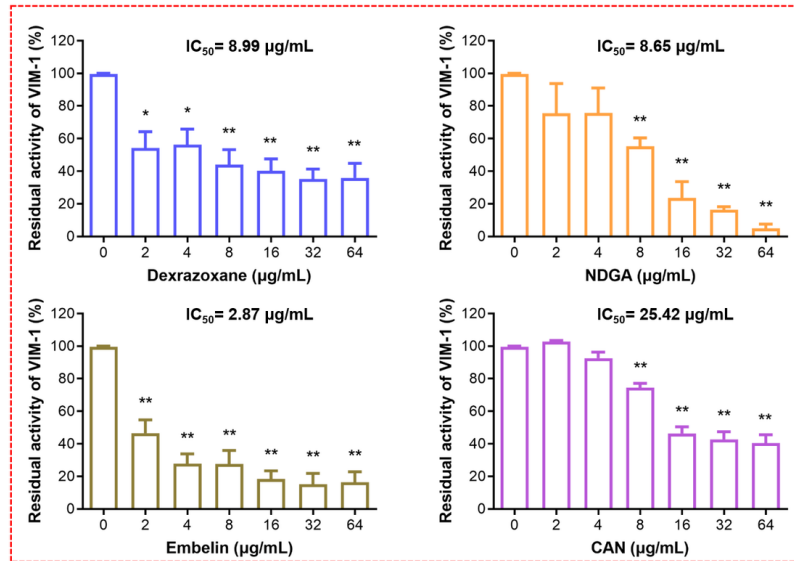

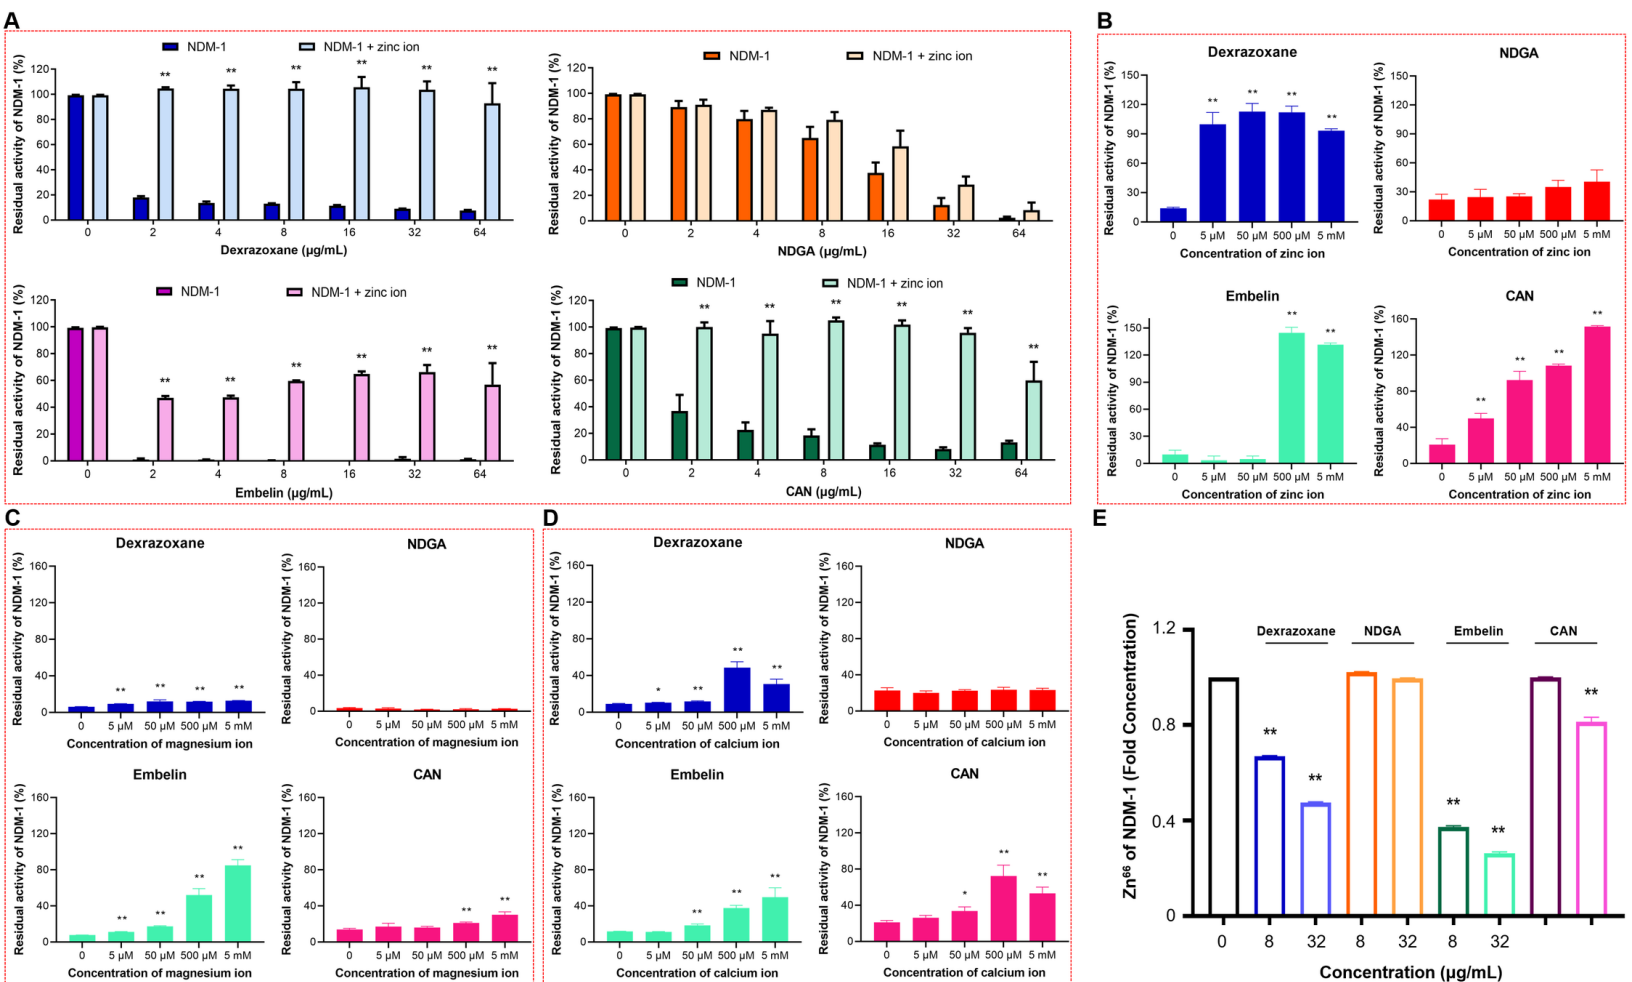



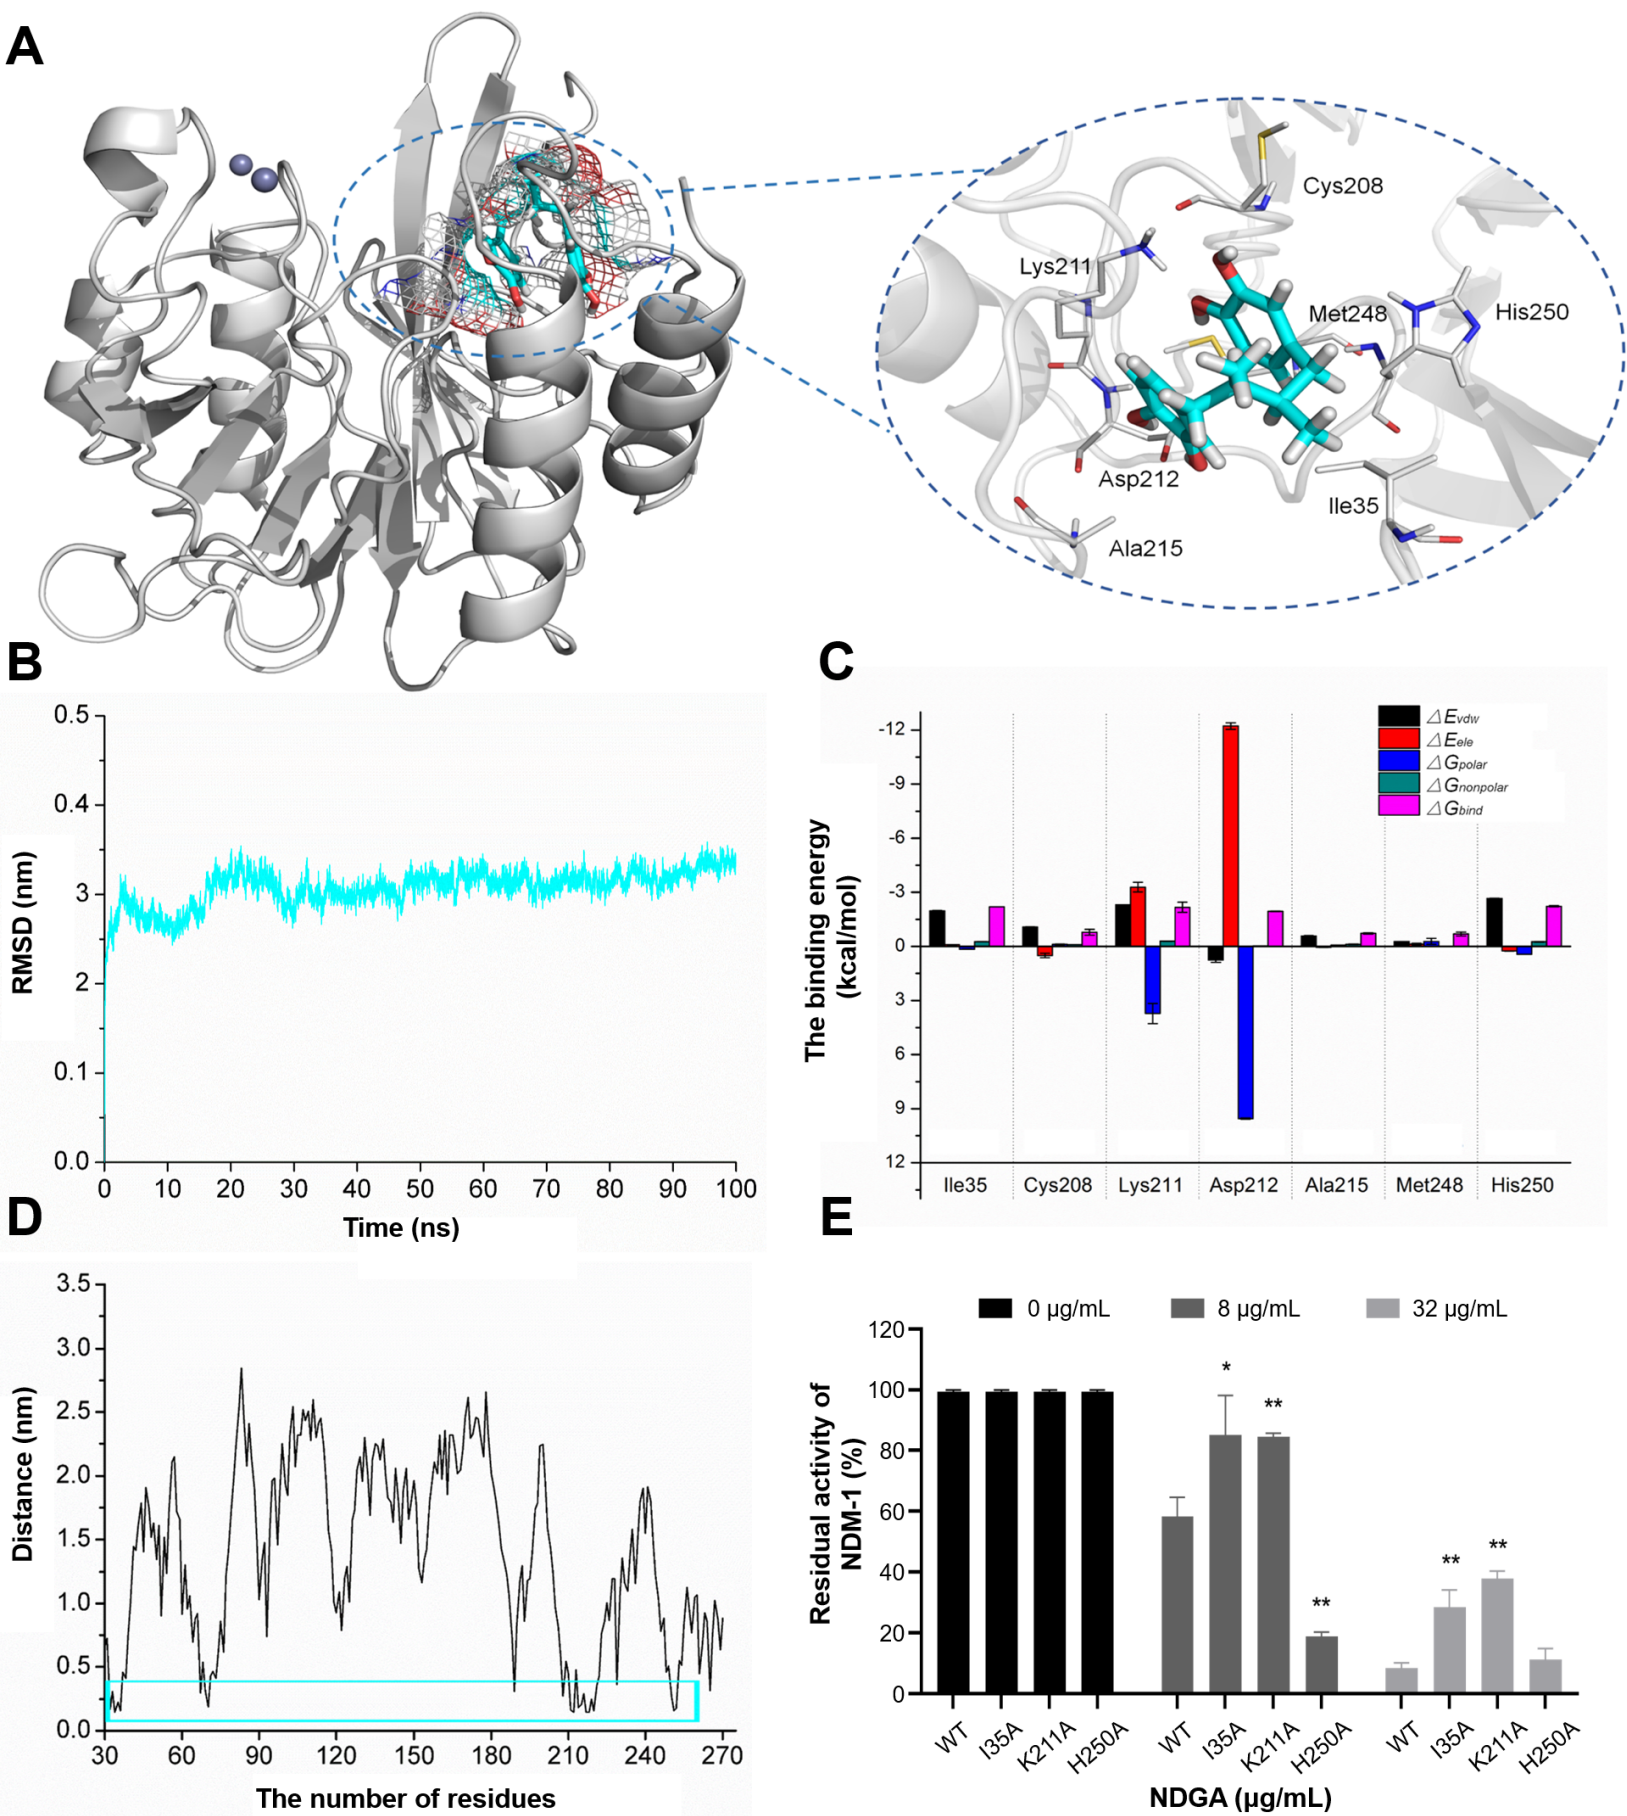

A

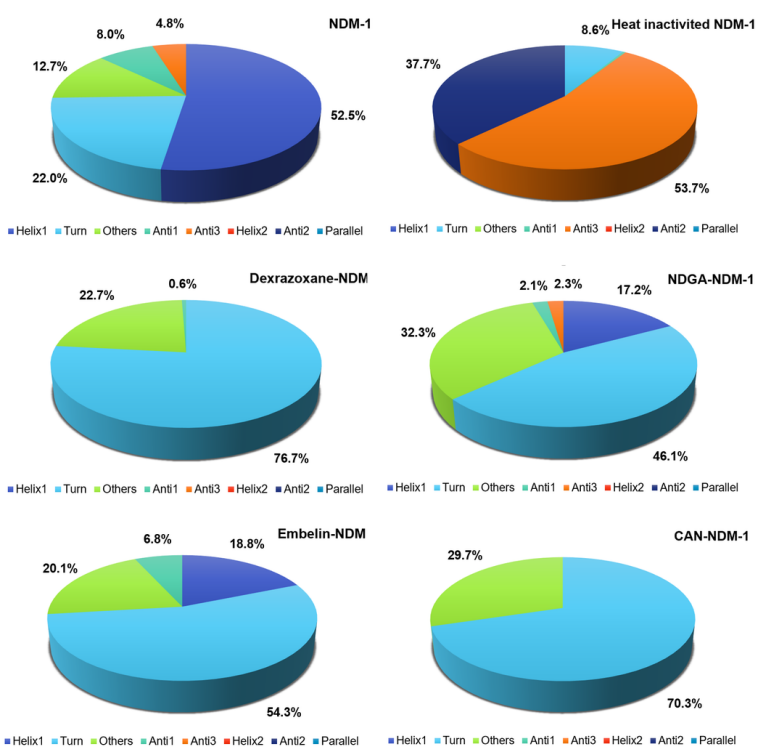

B

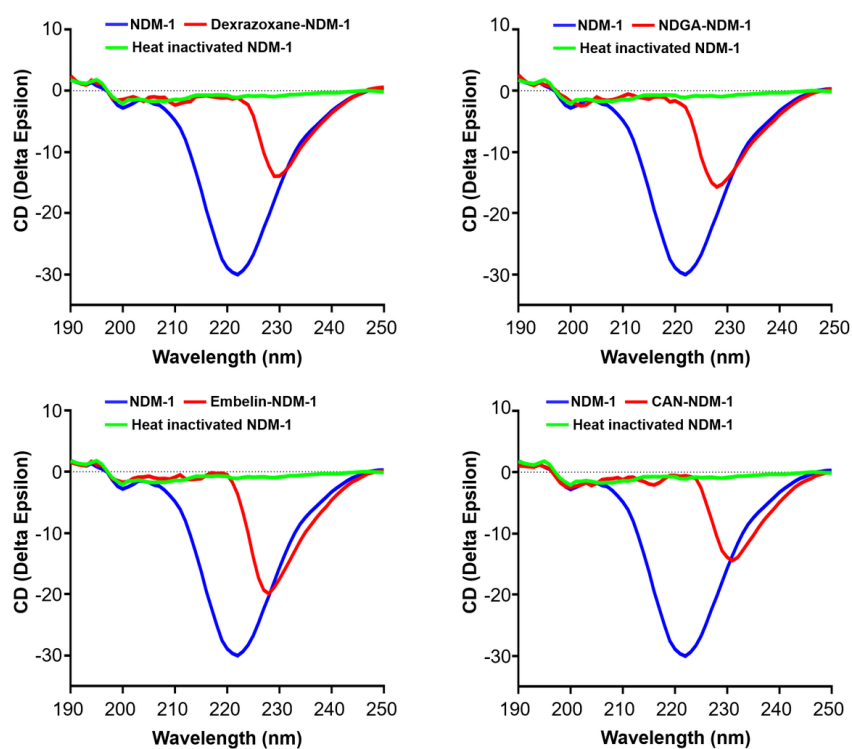

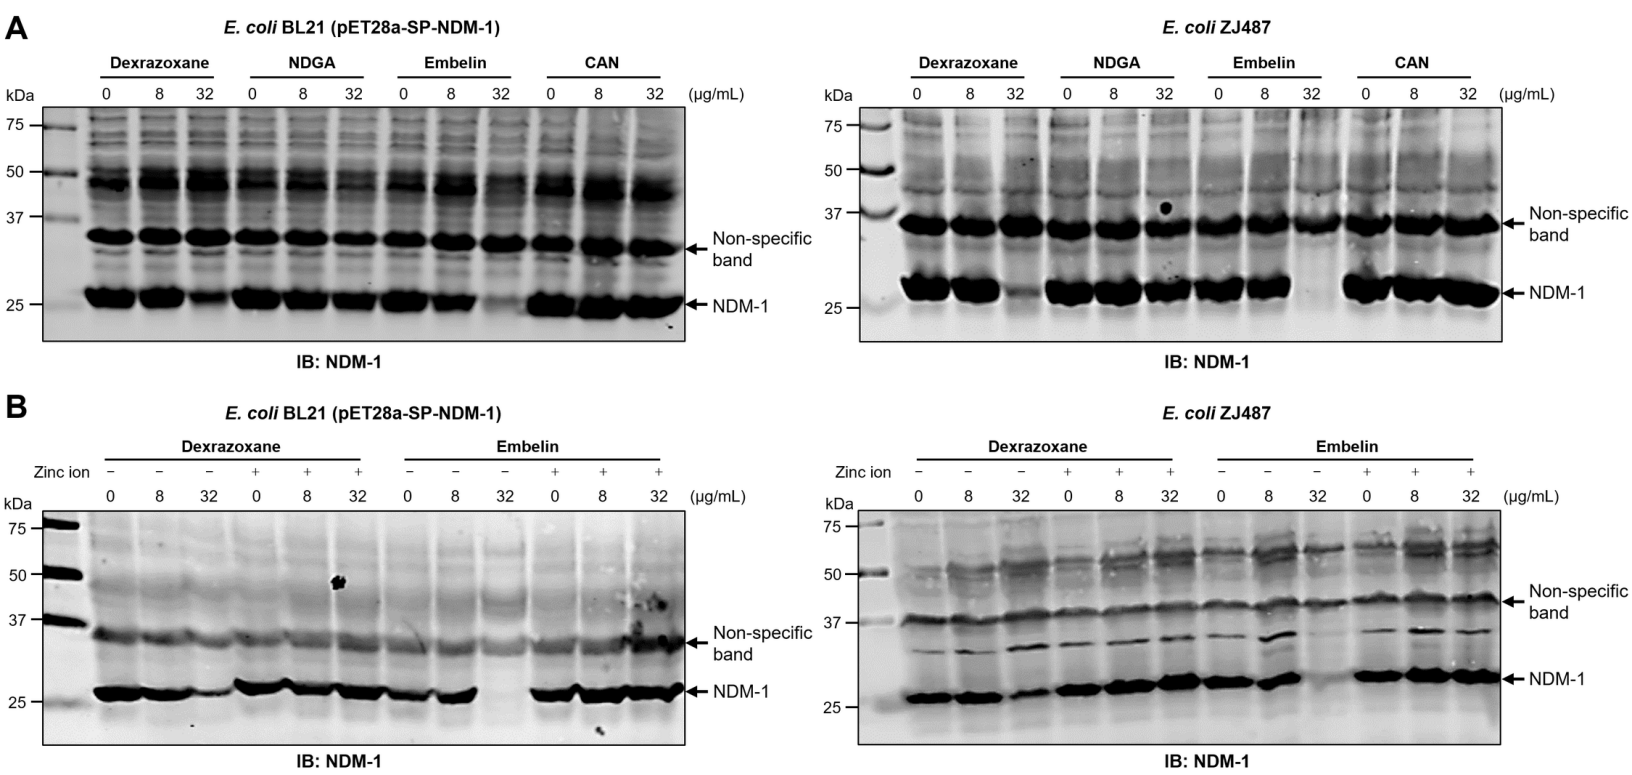

## A

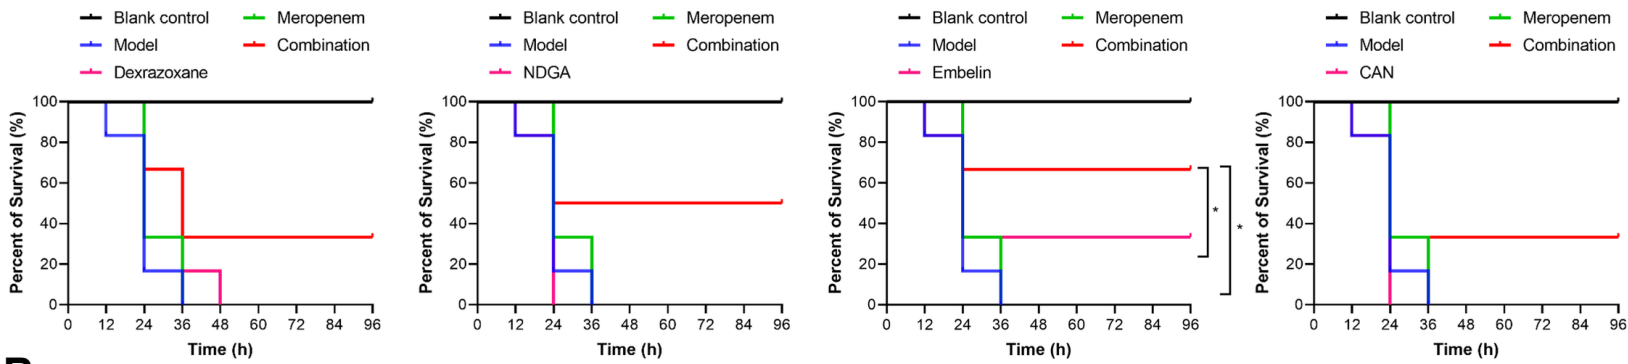

## B

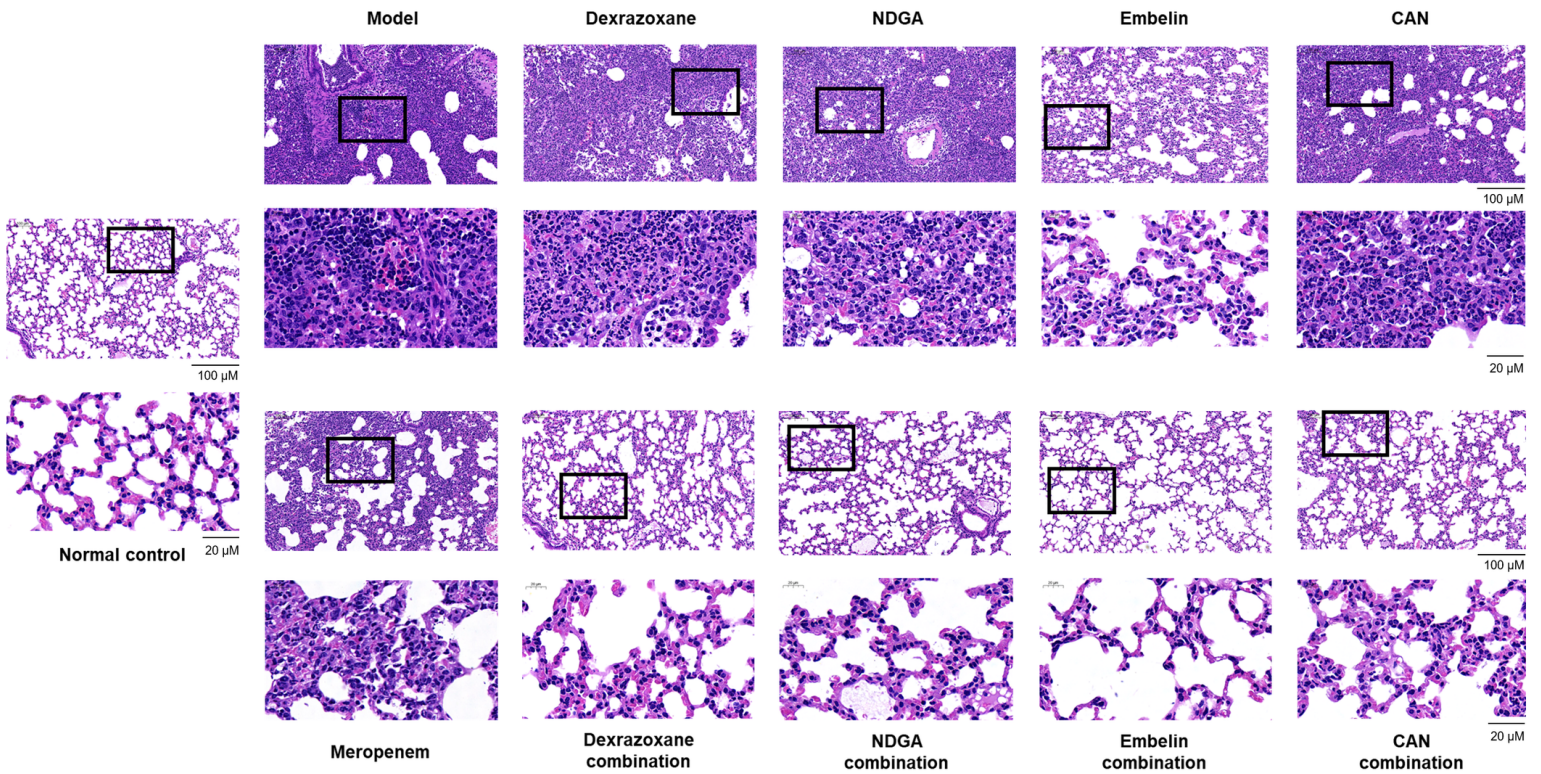

**A**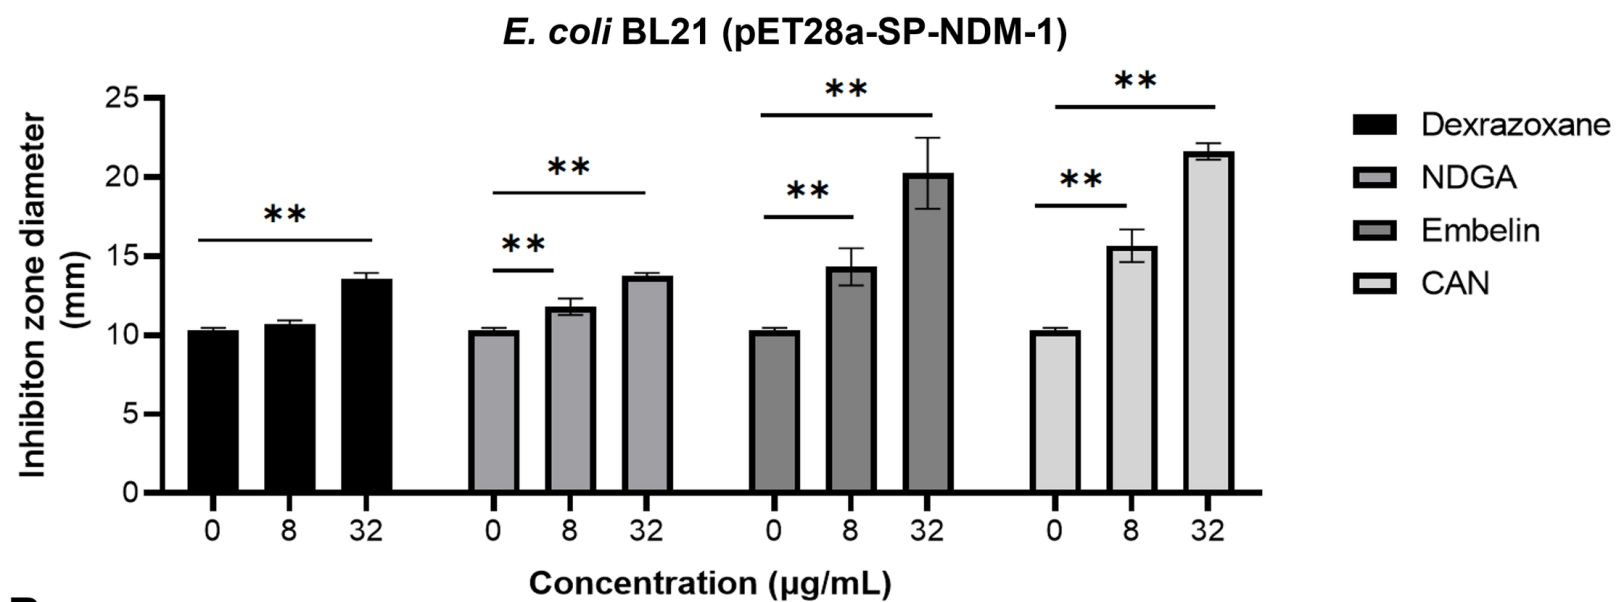**B**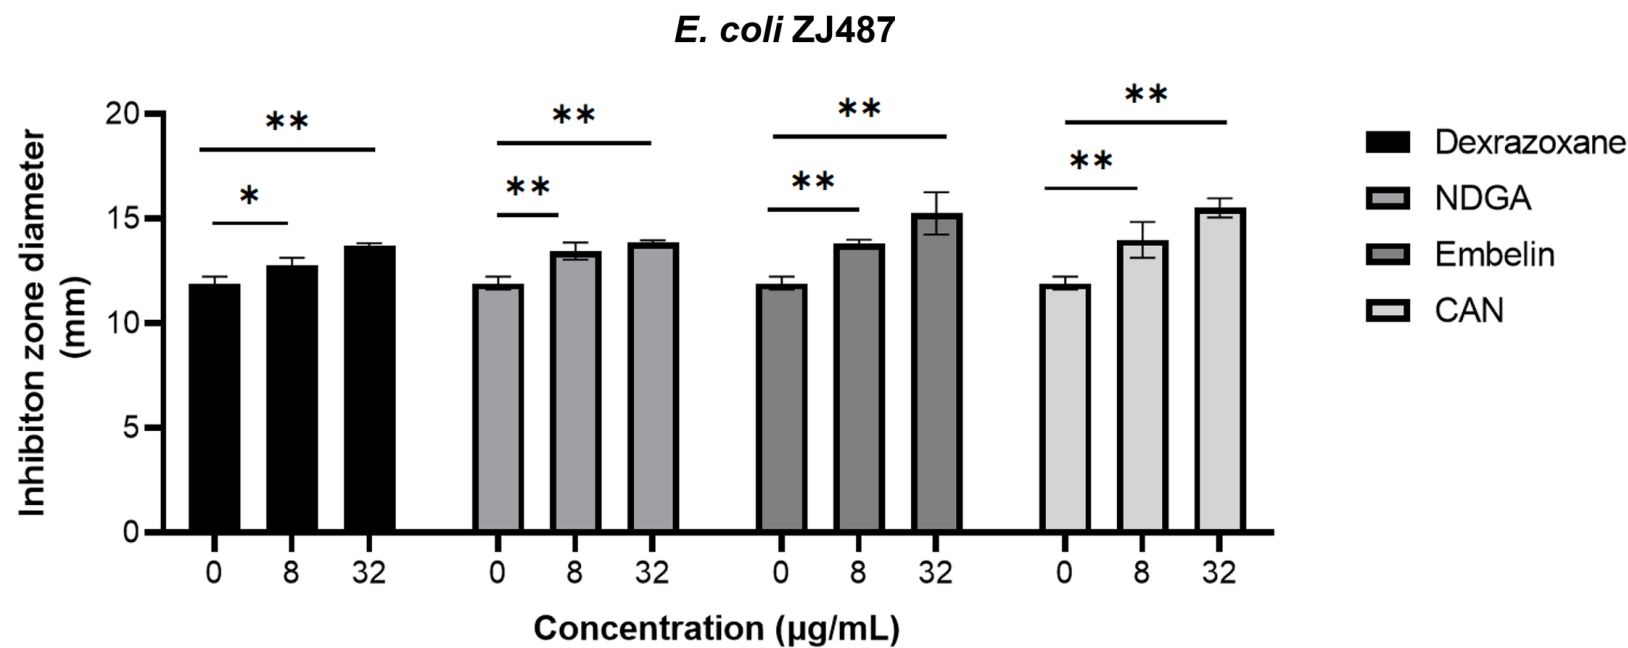

**A**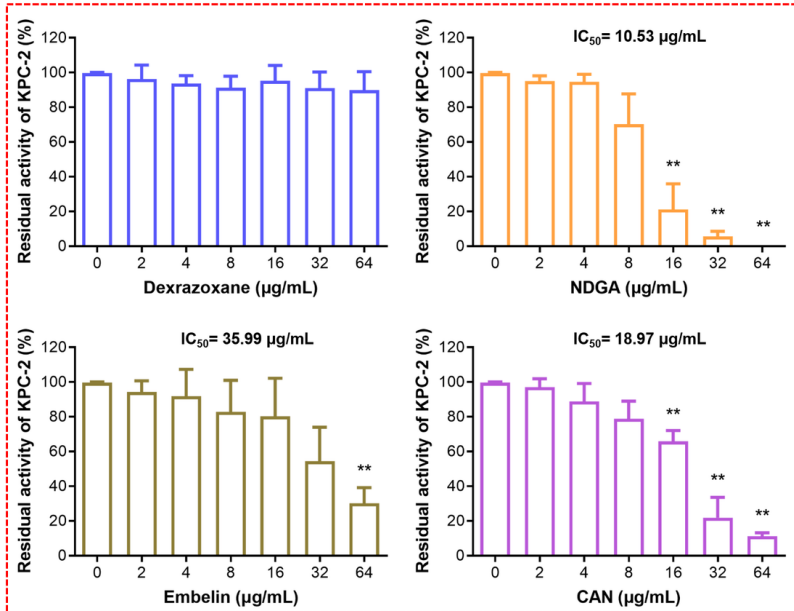**B**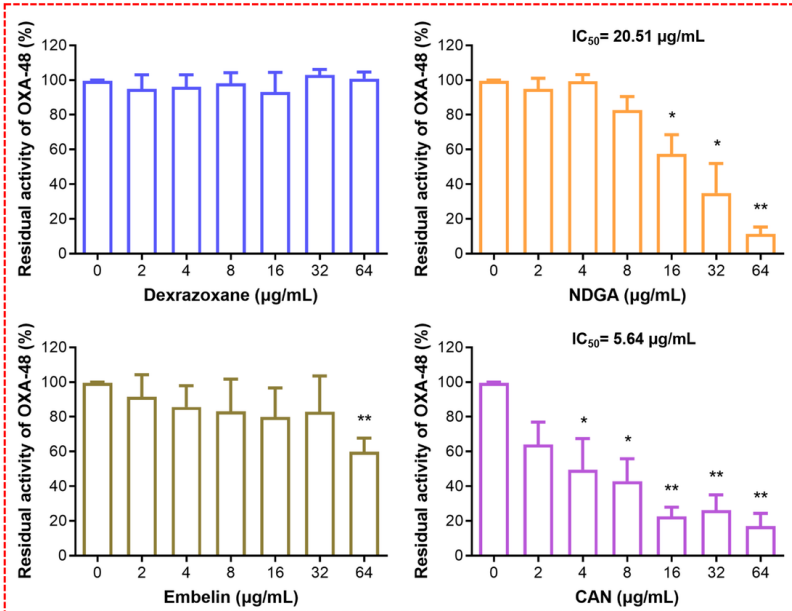

**A**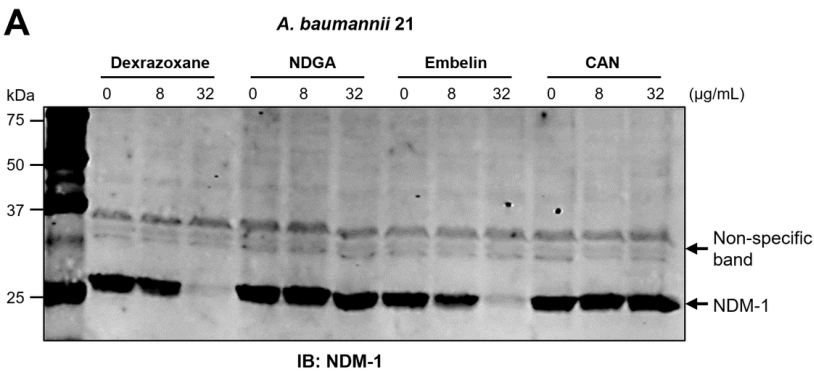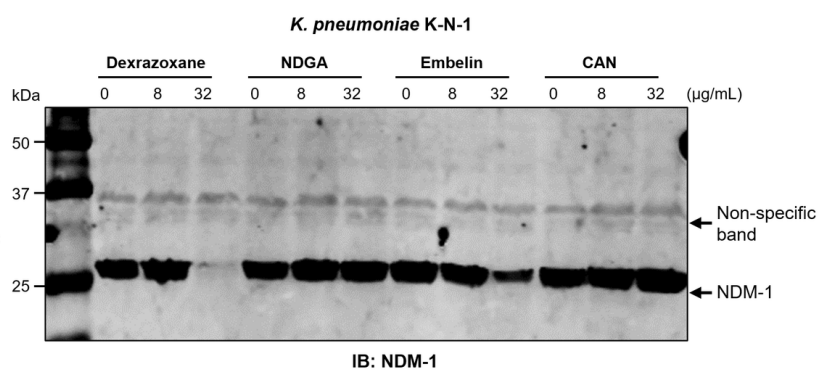**B**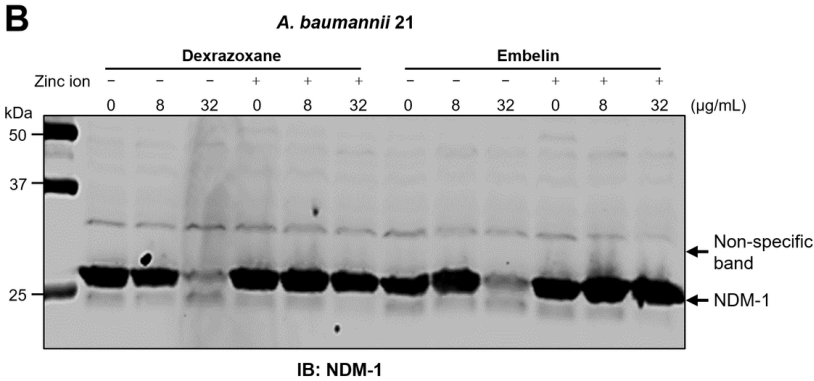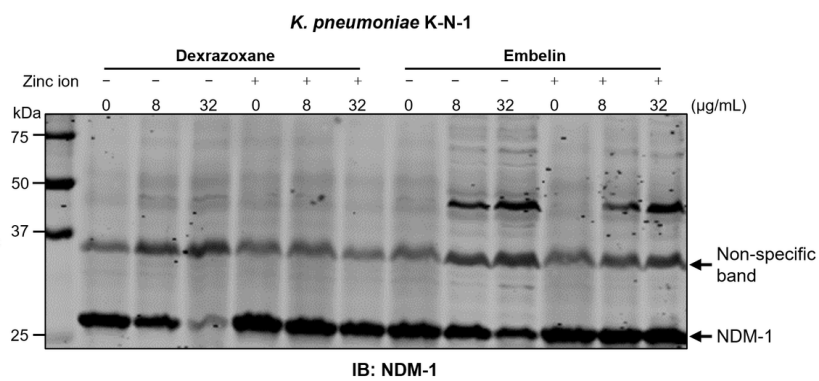

**A**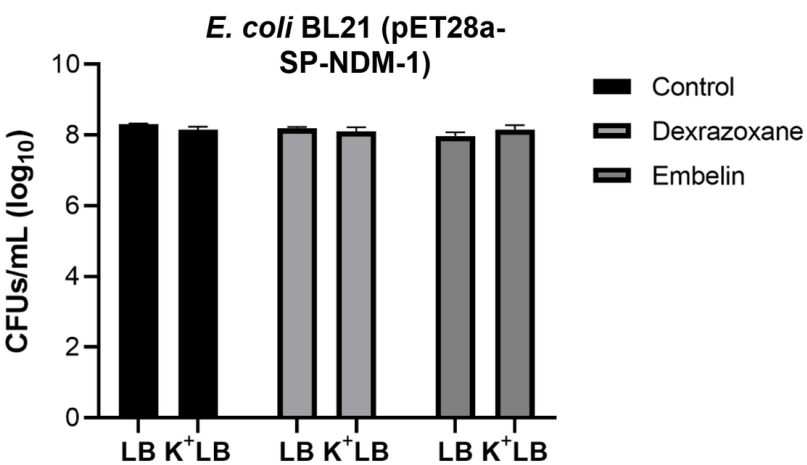**B**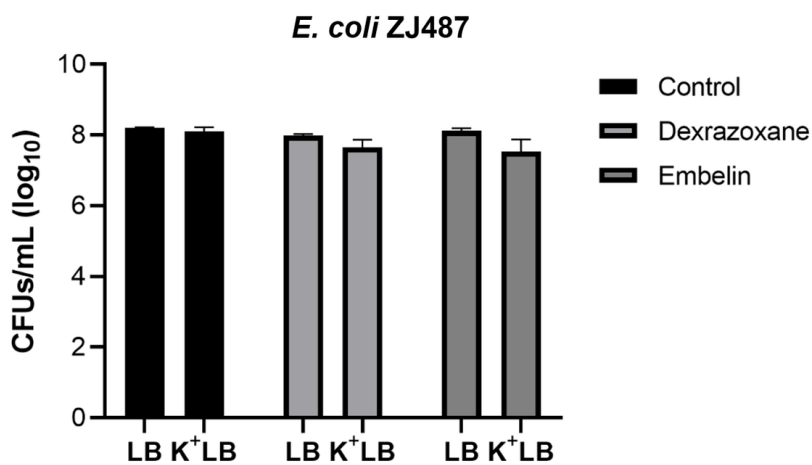**C**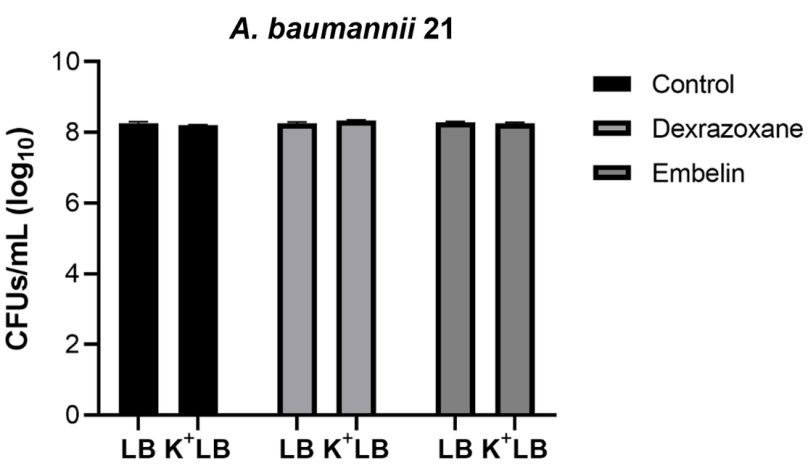**D**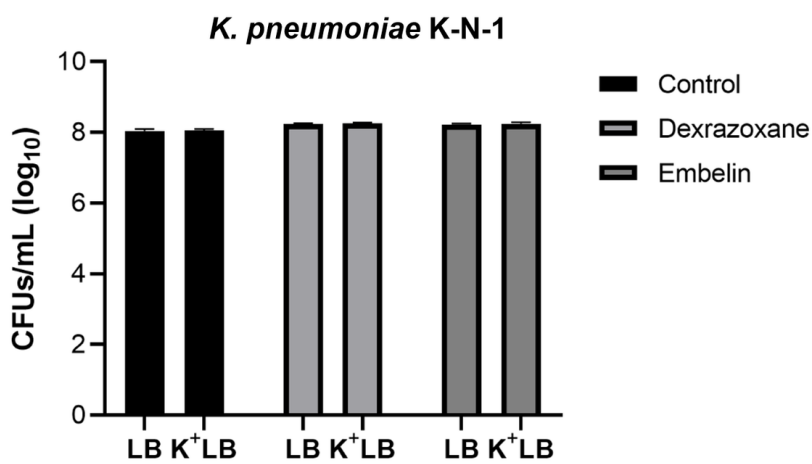



**A**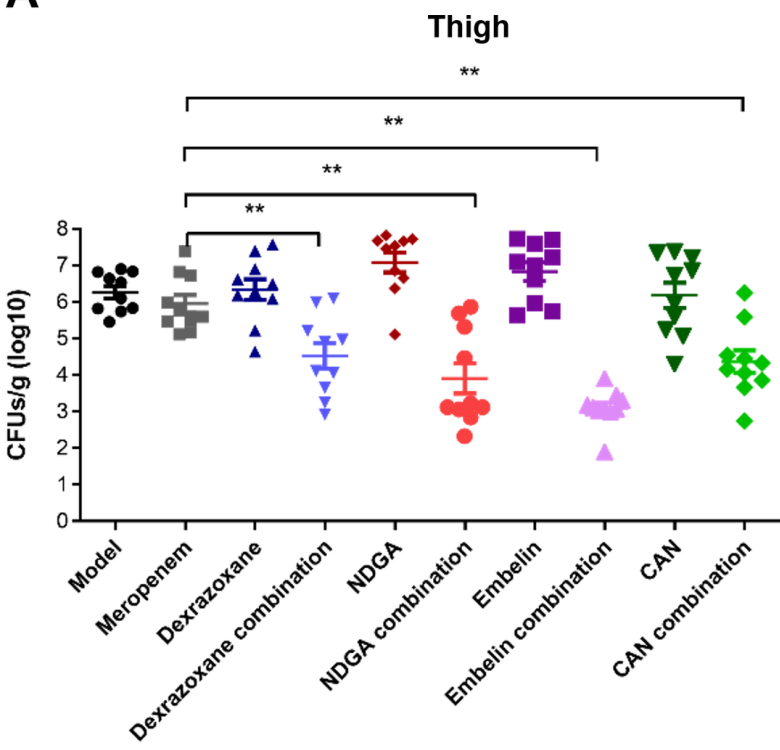**B**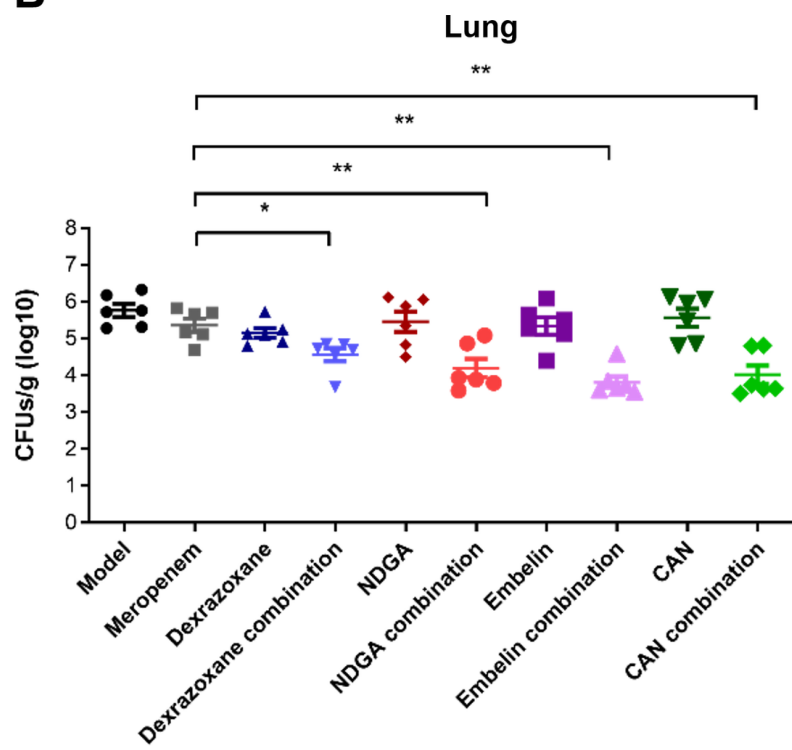

Source: https://www.biorxiv.org/content/10.1101/2022.01.16.476523v1.full.pdf
